# Supplementary material for: Intraperitoneal irinotecan with concomitant FOLFOX and bevacizumab for patients with unresectable colorectal peritoneal metastases: protocol of the multicentre, open-label, phase II, INTERACT-II trial
Source: PubMed Central journal article supplement — BMJ Open. 2024 Jan 18;14(1):e077667. doi: 10.1136/bmjopen-2023-077667 (PMC10806681; doi:10.1136/bmjopen-2023-077667), 2024-01-18
Supplement: bmjopen-2023-077667.draft_revisions.pdf [file bmjopen-2023-077667.draft_revisions.pdf]

# BMJ Open

BMJ Open is committed to open peer review. As part of this commitment we make the peer review history of every article we publish publicly available.

When an article is published we post the peer reviewers' comments and the authors' responses online. We also post the versions of the paper that were used during peer review. These are the versions that the peer review comments apply to.

The versions of the paper that follow are the versions that were submitted during the peer review process. They are not the versions of record or the final published versions. They should not be cited or distributed as the published version of this manuscript.

BMJ Open is an open access journal and the full, final, typeset and author-corrected version of record of the manuscript is available on our site with no access controls, subscription charges or pay-per-view fees (<http://bmjopen.bmj.com>).

If you have any questions on BMJ Open's open peer review process please email [info.bmjopen@bmj.com](mailto:info.bmjopen@bmj.com)

# BMJ Open

## Intraperitoneal irinotecan with concomitant FOLFOX and bevacizumab for patients with unresectable colorectal peritoneal metastases: protocol of the multicenter, open-label, phase II, INTERACT-II trial

|                               |                                                                                                                                                                                                                                                                                                                                                                                                                                                                                                                                                                                                                                                                                                                                                                                                                                                                                                                                                                                                                                                                                                                                                                                                                                                                                                                                                                                                                                   |
|-------------------------------|-----------------------------------------------------------------------------------------------------------------------------------------------------------------------------------------------------------------------------------------------------------------------------------------------------------------------------------------------------------------------------------------------------------------------------------------------------------------------------------------------------------------------------------------------------------------------------------------------------------------------------------------------------------------------------------------------------------------------------------------------------------------------------------------------------------------------------------------------------------------------------------------------------------------------------------------------------------------------------------------------------------------------------------------------------------------------------------------------------------------------------------------------------------------------------------------------------------------------------------------------------------------------------------------------------------------------------------------------------------------------------------------------------------------------------------|
| Journal:                      | <i>BMJ Open</i>                                                                                                                                                                                                                                                                                                                                                                                                                                                                                                                                                                                                                                                                                                                                                                                                                                                                                                                                                                                                                                                                                                                                                                                                                                                                                                                                                                                                                   |
| Manuscript ID                 | bmjopen-2023-077667                                                                                                                                                                                                                                                                                                                                                                                                                                                                                                                                                                                                                                                                                                                                                                                                                                                                                                                                                                                                                                                                                                                                                                                                                                                                                                                                                                                                               |
| Article Type:                 | Protocol                                                                                                                                                                                                                                                                                                                                                                                                                                                                                                                                                                                                                                                                                                                                                                                                                                                                                                                                                                                                                                                                                                                                                                                                                                                                                                                                                                                                                          |
| Date Submitted by the Author: | 11-Jul-2023                                                                                                                                                                                                                                                                                                                                                                                                                                                                                                                                                                                                                                                                                                                                                                                                                                                                                                                                                                                                                                                                                                                                                                                                                                                                                                                                                                                                                       |
| Complete List of Authors:     | de Vlasakker, Vincent ; Catharina Ziekenhuis, Department of Surgery<br>Guchelaar, Niels; Erasmus Medical Center, Department of Medical Oncology<br>van den Heuvel, Teun; Catharina Ziekenhuis, Department of Surgery<br>Lurvink, Robin; Catharina Hospital, Department of Surgery<br>van Meerten, Esther; Erasmus MC Kanker Instituut, Department of Medical Oncology<br>Bax, Ramon; Catharina Hospital, Department of Medical Oncology<br>Creemers, Geert-Jan; Catharina Hospital, Department of Medical Oncology<br>van Hellemond, Irene; Catharina Hospital, Department of Medical Oncology<br>Brandt-Kerkhof, Alexandra; Erasmus MC, Department of Surgical Oncology<br>Madsen, Eva; Erasmus MC, Department of Surgical Oncology<br>Nederend, Joost; Catharina Hospital, Department of Radiology<br>Koolen, Stijn; Erasmus MC, Department of Medical Oncology; Erasmus MC, Department of Pharmacy<br>Nienhuijs, Simon W.; Catharina Hospital, Department of Surgery<br>Kranenburg, Onno; UMC Utrecht, Department of Surgical Oncology and Utrecht Platform for Organoid Technology<br>de Hingh, Ignace; Catharina Hospital, Department of Surgery; Maastricht University GROW School for Oncology and Reproduction<br>Verhoef, Cornelis; Erasmus MC, Department of Surgical Oncology<br>Mathijssen, Ron; Erasmus Medical Center, Department of Medical Oncology<br>Burger, Jacobus; Catharina Hospital, Department of Surgery |
| Keywords:                     | CHEMOTHERAPY, Clinical Trial, Gastrointestinal tumours < ONCOLOGY, Colorectal surgery < SURGERY                                                                                                                                                                                                                                                                                                                                                                                                                                                                                                                                                                                                                                                                                                                                                                                                                                                                                                                                                                                                                                                                                                                                                                                                                                                                                                                                   |
|                               |                                                                                                                                                                                                                                                                                                                                                                                                                                                                                                                                                                                                                                                                                                                                                                                                                                                                                                                                                                                                                                                                                                                                                                                                                                                                                                                                                                                                                                   |

SCHOLARONE™  
Manuscripts

1  
2  
3  
4  
5  
6  
7  
8  
9  
10  
11  
12  
13  
14  
15  
16  
17  
18  
19  
20  
21  
22  
23  
24  
25  
26  
27  
28  
29  
30  
31  
32  
33  
34  
35  
36  
37  
38  
39  
40  
41  
42  
43  
44  
45  
46  
47  
48  
49  
50  
51  
52  
53  
54  
55  
56  
57  
58  
59  
60

# Intraperitoneal irinotecan with concomitant FOLFOX and bevacizumab for patients with unresectable colorectal peritoneal metastases: protocol of the multicenter, open-label, phase II, INTERACT-II trial

Vincent C.J. van de Vlasakker<sup>1\*</sup>, Niels. A.D. Guchelaar<sup>2\*</sup>, Teun B.M. van den Heuvel<sup>1</sup>, Robin J. Lurvink<sup>1</sup>, Esther van Meerten<sup>2</sup>, Ramon J.F. Bax<sup>3</sup>, Geert-Jan M. Creemers<sup>3</sup>, Irene E. G. van Hellemond<sup>3</sup>, Alexandra R.M. Brandt-Kerkhof<sup>4</sup>, Eva V.E. Madsen<sup>4</sup>, Joost Nederend<sup>5</sup>, Stijn L.W. Koolen<sup>2,6</sup>, Simon W. Nienhuijs<sup>1</sup>, Onno Kranenburg<sup>7</sup>, Ignace H.J.T. de Hingh<sup>1,8,9</sup>, Cornelis Verhoef<sup>4</sup>, Ron H.J. Mathijssen<sup>4</sup>, Jacobus W.A. Burger<sup>1</sup>

\*Authors contributed equally and are joint first authors

## Corresponding author

Dr. J. (Pim) W. A. Burger, MD, PhD;  
Surgeon, Department of Surgery; Catharina Cancer Institute;  
PO Box 1350, 5602 ZA, Eindhoven, Netherlands;  
E-mail; Pim.burger@catharinaziekenhuis.nl

**Trial registration number:** NL81672.100.22, <https://www.ccmo.nl/>

**Word count:** 3863

**Tables:** 1

**Figures:** 1

**Keywords:** Colorectal peritoneal metastases, intraperitoneal, irinotecan, bevacizumab, peritoneal access port

### Strengths and limitations of this study

- First prospective phase II study assessing the survival, safety and feasibility of treatment of Intraperitoneal irinotecan with concomitant FOLFOX and bevacizumab for patients with unresectable colorectal peritoneal metastases (CPM).
- Assessment of multiple secondary outcomes such as patient-reported outcomes, costs and the pharmacokinetics of intraperitoneally administered irinotecan.
- Translational research of the present study may provide fundamental insight in CPM
- The INTERACT-II study may be an important step towards a more effective, life-prolonging treatment modality for this specific patient group.
- It is a non-randomized phase II study and therefore no comparison can be made to a control group.

## Abstract

**Introduction:** The peritoneum is the second most affected organ for the dissemination of colorectal cancer (CRC). Patients with colorectal peritoneal metastases (CPM) face a poor prognosis, despite the majority of patients being treated with palliative systemic therapy. The efficacy of palliative systemic therapy is limited, due to the plasma-peritoneum barrier. The poor prognosis of unresectable CPM patients has resulted in the development of new treatment strategies where systemic therapy is combined with local, intraperitoneal chemotherapy. In the recently published phase I study the maximum tolerated dose (MTD) and thus the recommended phase II dose (RP2D) of intraperitoneal Irinotecan was investigated and determined to be 75 mg. In the present study, the overall survival after treatment with 75 mg irinotecan with concomitant mFOLFOX4 and bevacizumab will be investigated.

**Materials and Methods:** In this single-arm phase II study in two Dutch tertiary referral centers, 85 patients are enrolled. Eligibility criteria are an adequate performance status and organ function, histologically confirmed microsatellite stable and unresectable CPM, no previous palliative therapy for CRC, no systemic therapy <6 months for CRC prior to enrolment and no previous cytoreductive surgery and hyperthermic intraperitoneal chemotherapy (CRS and HIPEC). Patients will undergo a diagnostic laparoscopy as standard work-up for CPM and if the peritoneal disease is considered unresectable (e.g. PCI >20, too extensive small bowel involvement), a peritoneal access port and a port-a-cath are placed for administration of intraperitoneal and intravenous chemotherapy, respectively. Patients may undergo up to 12 cycles of study treatment. Each cycle consists of intravenous mFOLFOX4 with bevacizumab and concomitant intraperitoneal irinotecan (75 mg), which is repeated every two weeks, with a maximum of 12 cycles. Modified FOLFOX-4 regimen consists of 85 mg/m<sup>2</sup> oxaliplatin plus 200 mg/m<sup>2</sup> LV and 5-FU 400 mg/m<sup>2</sup> bolus on day 1 followed by 1600 mg/m<sup>2</sup> 5-FU as a 46-h infusion. Study treatment ends after the twelfth cycle, or earlier in case of disease progression or unacceptable toxicity. The primary outcome is overall survival and key secondary outcomes are progression-free survival, safety (measured by the amount of grade ≥3 adverse events [Common Terminology Criteria for Adverse Events V5.0]), patient-reported outcomes and pharmacokinetics of irinotecan. It is hypothesized that the trial treatment will lead to a 4 month increase in overall survival; from a median of 12.2 months, to 16.2 months.

**Ethics and Dissemination:** This study is approved by the Dutch Authority (CCMO, the Hague, the Netherlands), by a central medical ethics committee (MEC-U, Nieuwegein, the Netherlands) and by the institutional research boards of both research centers. Results will be submitted for publication in peer-reviewed medical journals and presented to patients and healthcare professionals.

## Introduction

The peritoneum is the second most common metastatic site in colorectal cancer, affecting approximately 10% of patients (1, 2). For a long time, the presence of colorectal peritoneal metastases (CPM) was considered to render the disease non-curable (3).

The introduction of cytoreductive surgery and hyperthermic intraperitoneal chemotherapy (CRS and HIPEC) resulted in improved survival in selected patients with limited colorectal peritoneal metastases as compared to palliative systemic therapy (4). However, only a small portion of patients is eligible for CRS and HIPEC, as the majority of patients have too extensive colorectal peritoneal metastases (CPM) to benefit from CRS and HIPEC (5).

The extent of peritoneal metastases is evaluated with the Peritoneal Cancer Index (PCI), which divides the abdomen in nine regions and the small bowel in four regions. Each region is given a score of 0-3 and the regions are summed up subsequently; a score of 0 reflects the absence of peritoneal metastases, while a maximum score of 39 indicates extensive disease in all regions (6). In general, CRS and HIPEC is not considered beneficial when the PCI exceeds 20 or when a macroscopic complete resection is not deemed feasible, for example in case of extensive small bowel involvement (7). The situation in which the patient has a  $PCI > 20$ , or when complete resection is deemed unfeasible, is referred to as unresectable CPM.

Currently, patients with unresectable CPM receive palliative systemic therapy or best supportive care. The prognosis of these patients is dismal, with a median overall survival of 6-8 months with best supportive care and 10-14 months with palliative systemic therapy (5). The plasma-peritoneum barrier is suggested to reduce efficacy of systemic therapy in the treatment of CPM, as compared to patients with lung or liver metastases from a colorectal origin. (8). The plasma-peritoneum barrier is a complex structure that regulates the intraperitoneal homeostasis, thus hampering an effective transportation of the systemic therapy to the peritoneal metastases(9).

By applying cytostatic therapies intraperitoneally, the traits of the plasma-peritoneum barrier can be used advantageously (9-13). Due to the limited absorption into the systemic circulation caused by the plasma-peritoneum barrier, higher intraperitoneal drug concentrations and prolonged exposure of PM to those drugs can be achieved compared to systemic administration(13).

The aforementioned CRS-HIPEC is based in part on these here described traits of the plasma-peritoneum barrier (10). In addition, different techniques, through which palliative chemotherapy can be applied intraperitoneally exist. With pressurized intraperitoneal aerosol chemotherapy (PIPAC), chemotherapy is administered as aerosol during repetitive laparoscopies, while the INTERACT I study investigated the intraperitoneal administration of chemotherapy through an intraperitoneal access port (14-16).

1  
2  
3 In addition to various techniques for the intraperitoneal application of chemotherapy, a variety of  
4 cytotoxic agents can be used (13, 17). One of the chemotherapeutic groups that has been studied and  
5 that shows promise is the group of topoisomerase inhibitors (13).  
6

7  
8 Irinotecan is a topoisomerase I inhibitor and was the chemotherapeutic agent that was studied in the  
9 INTERACT I study. Irinotecan is a prodrug and its main efficacy is attributed to its metabolite SN-38,  
10 which is 100-1000 fold more cytotoxic than irinotecan. The conversion to SN-38 takes place in both the  
11 liver and intraperitoneal space (18-24). Several studies showed that the intraperitoneal area under the  
12 curve of irinotecan and SN-38 was much higher after intraperitoneal administration than after systemic  
13 administration. Additionally, the peritoneal clearance of intraperitoneally administered irinotecan was  
14 10-fold lower than after systemic administration of irinotecan (21, 25-28).  
15  
16

17  
18  
19  
20  
21 Intraperitoneal chemotherapy, such as irinotecan, can either be applied as monotherapy, or in  
22 combination with systemic therapy. In both ovarian and gastric cancer the addition of intraperitoneal  
23 chemotherapy to systemic chemotherapy showed promising results (20, 29-32). Moreover, in ovarian  
24 cancer, a beneficial effect was proven by a large randomized controlled trial (32). These findings, in  
25 combination with the promising results of the INTERACT I study, suggest that intraperitoneal  
26 chemotherapy in addition to systemic therapy could be beneficial in patients with unresectable  
27 colorectal peritoneal metastases as well (33).  
28  
29  
30  
31  
32

33  
34  
35 The recent INTERACT study (NL63809.078.18) was a dose-escalation study and was performed to find  
36 the maximum tolerated dose (MTD) of intraperitoneal (IP) irinotecan (16). In this study, 18 patients  
37 with unresectable colorectal peritoneal metastases were treated with first-line palliative systemic  
38 therapy with FOLFOX/bevacizumab and concomitant intraperitoneal irinotecan at flat dose levels of  
39 50 mg (n=4), 75 mg (n=9), and 100 mg (n=4). For the 50 mg and 75 mg dose cohorts, no dose-limiting  
40 toxicities were observed. After two dose-limiting toxicities at the 100 mg dose level, the MTD was thus  
41 established at 75 mg.  
42  
43  
44  
45  
46

47  
48 The INTERACT-II study is a multi-center, single-arm, phase II study, aimed to assess overall survival,  
49 progression-free survival, safety, patient reported outcomes (PRO's), costs and pharmacokinetics of  
50 75mg IP irinotecan with concomitant first-line systemic therapy (consisting of FOLFOX and  
51 bevacizumab) in patients with unresectable CPM.  
52  
53  
54  
55  
56

## 57 **Methods and analysis**

58  
59 This protocol summary follows the Standard Protocol Items: Recommendations for Interventional  
60 Trials (SPIRIT) Statement (34).



## Setting

This study is a single-arm, open-label, phase II study that is performed in two large Dutch tertiary referral centers for the treatment of CPM; The Catharina Cancer Institute in Eindhoven and the Erasmus MC Cancer Institute in Rotterdam. Further tertiary referral centers may join later.

## Objectives

*The primary objective* is to explore overall survival after treatment with intraperitoneal irinotecan (75 mg) to mFOLFOX4 / bevacizumab in patients with unresectable colorectal peritoneal metastases, henceforth referred to as trial treatment.

*Secondary objectives are:*

- To assess progression-free survival (which is calculated from the interval from the start of trial treatment until first evidence of intraperitoneal and/or systemic disease progression and/or start of second-line systemic therapy, or last follow-up).
- To assess the feasibility of trial treatment; to assess the toxicity profile (defined as the number of grade 3-5 adverse events according to the Common Terminology Criteria for Adverse Events [CTCAE]) of trial treatment.
- To assess patient reported outcomes (PROs) during trial treatment.
- To assess costs of trial treatment
- To assess the nephrotoxicity, hepatotoxicity, and hematological toxicity during trial treatment.
- To assess tumor marker fluctuations during trial treatment.
- To determine the number of patients completing trial treatment, required dose reductions, and reasons for discontinuation.
- To determine the number of patients with an objective radiological response during and after trial treatment.
- To systematically collect, process, and store blood, tumor tissue and ascites for future translational research
- To determine the systemic and intraperitoneal pharmacokinetics of intraperitoneal irinotecan.

*Exploratory objectives* are to determine if, and how many patients are able to undergo salvage procedures, such as CRS and HIPEC following successful treatment with intraperitoneal irinotecan (75 mg) and concomitant palliative systemic therapy.

## Eligibility criteria

Eligibility criteria are:

- Histologically confirmed colorectal carcinoma.
- Microsatellite stable (MSS) primary tumor.
- Radiologically and clinically or pathologically confirmed unresectable colorectal peritoneal metastases (e.g. PCI >20, extensive small bowel involvement, unresectable disease due to anatomical location).
- WHO performance score of 0-1 with a life expectancy of >3 months.
- Aged 18 years or older.
- Adequate organ functions (hemoglobin of  $\geq 5$  mmol/L, neutrophil count of  $\geq 1.5 \times 10^9/L$ , platelet count of  $\geq 100 \times 10^9/L$ , serum creatinine of  $< 1.5$  x upper limit of normal [ULN], creatinine clearance of  $\geq 30$  ml/min, Bilirubin  $< 2$  x ULN and liver transaminases of  $< 5$  x ULN).
- Absence of extensive systemic metastases that are deemed to be the dominant factor determining prognosis in terms of life expectancy and performance status (e.g. no imminent threat of impaired organ functioning due to the presence of systemic metastases).
- No prior cytoreductive surgery.
- No prior palliative systemic therapy for colorectal cancer.
- No (neo)adjuvant/adjuvant systemic therapy for colorectal cancer within 6 months prior to enrollment.
- No homozygous UGT1A1\*28 genotype(35).
- No dihydropyrimidine dehydrogenase (DPD) deficiency.
- No contra-indications for the planned chemotherapy (e.g. active infection, serious concomitant disease, severe allergy), as determined by the medical oncologist.

### Study treatment

The study flowchart is presented in figure 1. The study schedule of enrollment, treatment and assessment is shown in table 1.

### Diagnostic laparoscopy and port placement

Patients who are candidates for CRS and HIPEC are discussed in a multidisciplinary oncology team meeting, after which they are scheduled for a diagnostic laparoscopy. Patients who are considered to have a high chance of unresectable CPM, based on radiological or clinical investigations, may be enrolled in the study. After enrollment, a diagnostic laparoscopy is performed to inspect the peritoneal cavity. The diagnostic laparoscopy is performed under general anesthesia. If peritoneal disease is

1  
2  
3 considered unresectable (e.g. due to PCI >20, too extensive small bowel involvement or anatomical  
4 location), two ports are placed: one regular intravenous port-a-cath for the intravenous administration  
5 of chemotherapy according to local standard of care, and one peritoneal access port for the  
6 intraperitoneal administration of chemotherapy. The peritoneal access port is placed on the fascia just  
7 above or just below the lower rib cage at the discretion of the surgeon. The catheter is tunneled and  
8 inserted into the peritoneal cavity. The tip is positioned in the pelvis. Ascites (or 0.9% NaCl lavage) is  
9 collected for translational research. Patients may be discharged the same day after having received  
10 instructions for hygiene and wound care.  
11  
12  
13  
14  
15  
16  
17  
18  
19

### 20 Chemotherapy

21  
22 In the absence of post-operative complications, the first cycle will start at least one week after  
23 placement of the ports, to allow for sufficient wound healing. Each cycle consists of intravenous  
24 mFOLFOX4 with bevacizumab and concomitant intraperitoneal irinotecan (75 mg). Intraperitoneal  
25 irinotecan (75 mg) will be dissolved in 1 liter NaCl 0.9% and pre-warmed to 37°C. Cycles are repeated  
26 every two weeks, with a maximum of 12 cycles. Modified FOLFOX-4 regimen consists of 85 mg/m<sup>2</sup>  
27 oxaliplatin plus 200 mg/m<sup>2</sup> LV and 5-FU 400 mg/m<sup>2</sup> bolus on day 1 followed by 1600 mg/m<sup>2</sup> 5-FU as a  
28 46-h infusion (27). In case of symptomatic ascites, the ascites will be (partly) drained through the  
29 peritoneal access port prior to the start of the therapy cycle.  
30  
31  
32  
33  
34  
35

### 36 Response evaluation

37  
38 Before each cycle, the patient is evaluated (based on clinical and biochemical parameters) by the  
39 treating medical oncologist. After every fourth cycle, a thoracoabdominal computed tomography (CT)  
40 scan is performed for response evaluation. After each CT scan, the decision to continue trial treatment  
41 is based on disease response and clinical performance:  
42  
43  
44

- 45 ➤ In case of physician-determined disease progression (either intraperitoneal, systemic, or  
46 both), trial treatment is discontinued. The patient will receive second line palliative systemic  
47 treatment or best supportive care according to the Dutch national guideline for colorectal  
48 cancer (36).
- 49 ➤ In case of physician-determined disease response or stable disease (both intraperitoneal and  
50 systemic) but severe clinical deterioration or unacceptable toxicity to treatment, rendering the  
51 patient unsuited to continue with treatment, trial treatment is discontinued. The patient will  
52 receive further palliative systemic treatment or best supportive care according to the Dutch  
53 national guideline for colorectal cancer (36).  
54  
55  
56  
57  
58  
59  
60

- In case of physician-determined disease response or stable disease (both intraperitoneal and systemic) and sufficient clinical condition and acceptable toxicity to treatment, trial treatment is continued.

For all patients, study treatment ends after completing the twelfth cycle of intravenous mFOLFOX4 with bevacizumab and concomitant intraperitoneal irinotecan (75 mg), regardless of response on the thoracoabdominal CT performed after the twelfth cycle. On patient's request, the peritoneal access port is removed after the last cycle of trial treatment. After the evaluation after the twelfth cycle, intraperitoneal chemotherapy will be discontinued definitively and further treatment is scheduled with the medical oncologist and will be in according to local standard of care and may include of CRS-HIPEC (36).

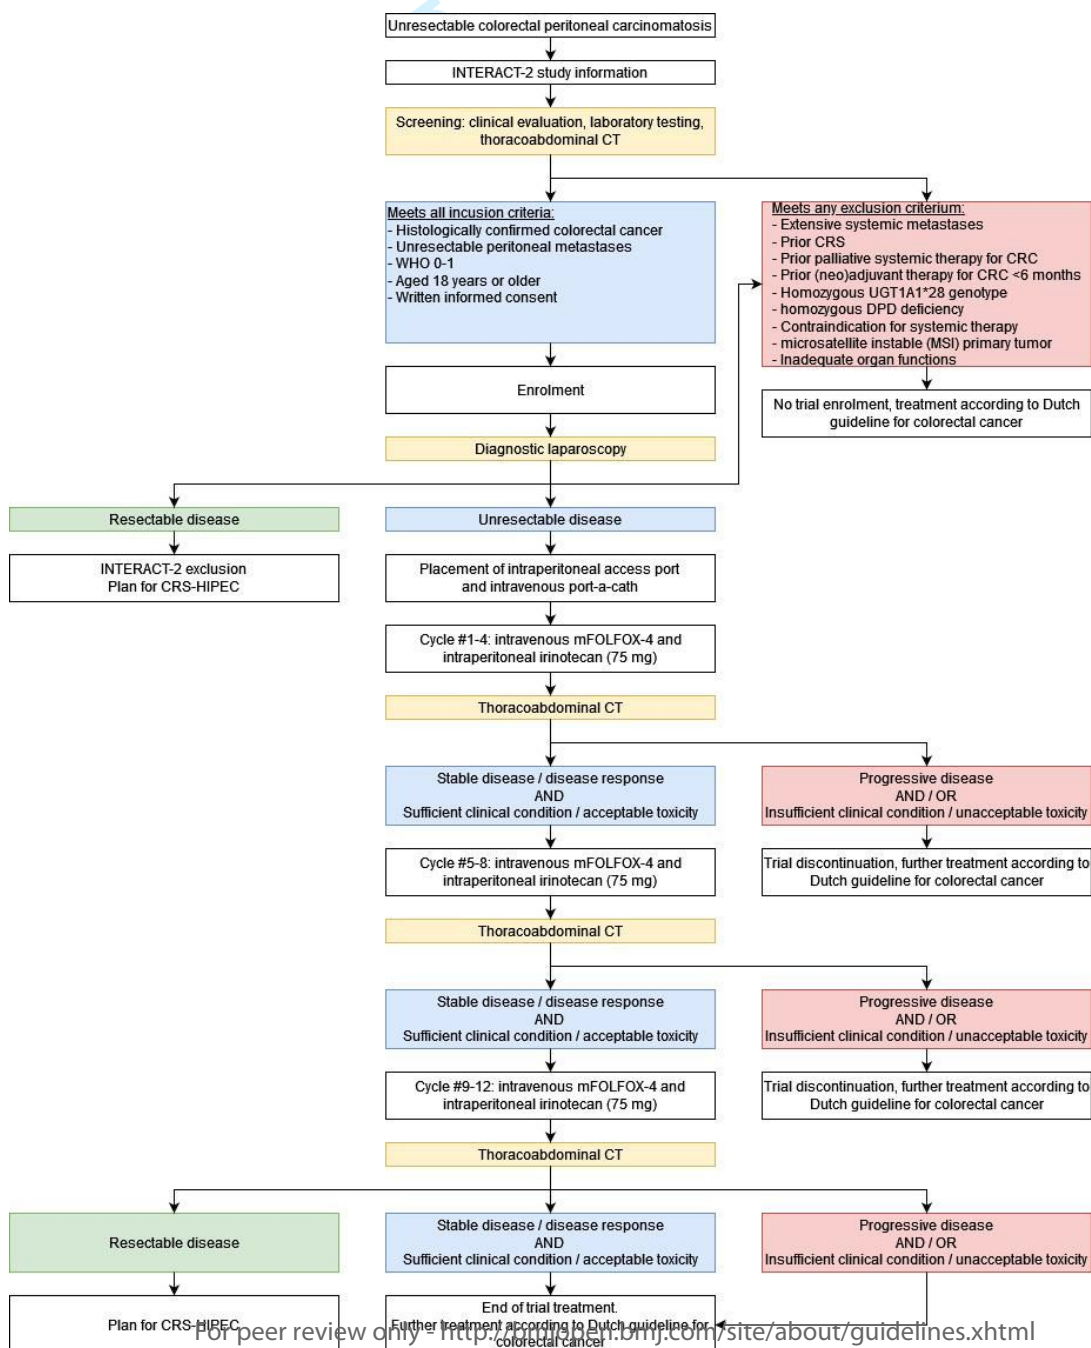

1  
2  
3  
4  
5  
6  
7  
8 Figure 1. Study flowchart. WHO, World Health Organization performance status; CRS, cytoreductive surgery;  
9 CRC, HIPEC, hyperthermic intraperitoneal chemotherapy; colorectal cancer; DPD, dihydropyrimidine  
10 dehydrogenase.  
11  
12  
13  
14  
15  
16  
17  
18  
19  
20  
21  
22  
23  
24  
25  
26  
27  
28  
29  
30  
31  
32  
33  
34  
35  
36  
37  
38  
39  
40  
41  
42  
43  
44  
45  
46  
47  
48  
49  
50  
51  
52  
53  
54  
55  
56  
57  
58  
59  
60

For peer review only

Sample based have an survival

size Population studies described overall of

Protocol ID

Table 1. Overview of study procedures

| For per                                    | Screening | Enrollment | Medical oncologist intake | Diagnostic laparoscopy | Cycle #1 | Cycles #2-4 | One week after cycle #4 | Cycles #5-8 | One week after cycle #8 | Cycles #9-12 | One week after cycle #12 | Last study visit |
|--------------------------------------------|-----------|------------|---------------------------|------------------------|----------|-------------|-------------------------|-------------|-------------------------|--------------|--------------------------|------------------|
| Multidisciplinary tumor board              | X         |            |                           |                        |          |             | X                       |             | X                       |              | X                        |                  |
| Medical history                            | X         | X          | X                         |                        |          |             |                         |             |                         |              |                          |                  |
| Inclusion and exclusion criteria           | X         | X          | X                         |                        |          |             |                         |             |                         |              |                          |                  |
| Provide study information                  | X         | X          | X                         |                        |          |             |                         |             |                         |              |                          |                  |
| Written informed consent                   | X         | X          | X                         |                        | X        | X           |                         | X           |                         | X            |                          |                  |
| Physical examination                       |           | X          | X                         |                        |          |             |                         |             |                         |              |                          |                  |
| Pre-operative screening                    |           | X          |                           |                        |          |             |                         |             |                         |              |                          |                  |
| Eligibility test: DPD and UGT1A1 genotype  |           | X          |                           |                        | X        | X           |                         | X           |                         | X            |                          |                  |
| Blood test: organ functions                |           | X          |                           |                        | X        | X           |                         | X           |                         | X            |                          |                  |
| Blood test: tumor marker <sup>a</sup>      |           | X          |                           |                        | X        | X           |                         | X           |                         | X            |                          |                  |
| Blood test: pregnancy <sup>b</sup>         |           | X          |                           |                        |          |             |                         |             |                         |              |                          |                  |
| Electrocardiogram                          |           | X          |                           |                        |          |             |                         |             |                         |              |                          |                  |
| Placement of port-a-cath                   |           |            |                           | X                      |          |             |                         |             |                         |              |                          |                  |
| Placement of peritoneal access port        |           |            |                           | X                      |          |             | X                       |             | X                       |              | X                        |                  |
| Thoracoabdominal CT scan <sup>c</sup>      |           | X          |                           |                        |          |             |                         |             |                         |              |                          |                  |
| Systemic chemotherapy                      |           |            |                           |                        | X        | X           |                         | X           |                         | X            |                          |                  |
| Intraperitoneal chemotherapy               |           |            |                           |                        | X        | X           |                         | X           |                         | X            |                          |                  |
| Clinical evaluation                        |           | X          | X                         |                        | X        | X           |                         | X           |                         | X            |                          | X                |
| Toxicity evaluation (CTCAE)                |           |            |                           |                        | X        | X           |                         | X           |                         | X            |                          | X                |
| Patient Reported Outcomes Questionnaires   |           | X          |                           |                        | X        | X           |                         | X           |                         | X            |                          |                  |
| Costs Questionnaires                       |           | X          |                           |                        | X        | X           |                         | X           |                         | X            |                          |                  |
| Pharmacokinetics                           |           |            |                           |                        | X        | X*          |                         |             |                         |              |                          |                  |
| Progression Free Survival                  |           |            |                           |                        | X        | X           |                         | X           |                         | X            |                          | X                |
| Overall Survival                           |           |            |                           |                        | X        | X           |                         | X           |                         | X            |                          | X                |
| Remove peritoneal access port <sup>d</sup> |           |            |                           |                        |          |             |                         |             |                         |              |                          |                  |
| Translational Research: blood              |           | X          |                           |                        | X        | X           |                         | X           |                         | X            |                          | X                |
| Translational Research: ascites            |           |            |                           |                        | X        | X*          |                         |             |                         |              |                          |                  |

<sup>a</sup>Unless already performed <6 weeks before diagnostic laparoscopy; <sup>b</sup>On patient's request; <sup>c</sup>Carcino-embryonic antigen; <sup>d</sup>Only determined in women of fertile age (<55 years); <sup>e</sup>Unless already performed <6 weeks before diagnostic laparoscopy; <sup>f</sup>On patient's request; CT, Computed Tomography; CTCAE, Common Terminology Criteria for Adverse Events; Marked in grey: study-specific procedures; \*Only at cycle 4

1  
2  
3 approximately 12.2 months (5) for patients with isolated unresectable colorectal peritoneal  
4 metastases treated with palliative systemic chemotherapy. Based on clinical experience, expert  
5 consensus and the preliminary results of the INTERACT study, we hypothesize that the study treatment  
6 will result in a median overall survival of at least 16.2 months. This entails an expected increase of 4  
7 months in the study population in comparison to the general population of patients with unresectable  
8 CPM. To render this assumption plausible, with a power of 80% and a type I error rate of 0.05, a sample  
9 size of 85 is needed.

10  
11  
12  
13  
14  
15 Given the previous experience with the trial treatment from the INTERACT study and the low expected  
16 additional toxicity of intraperitoneal irinotecan, the investigators consider it reasonable and safe to  
17 expose 85 patients to trial treatment.

#### 21 Replacement of individual patients

22  
23 If a patient is withdrawn from the study prior to completing one cycle of intraperitoneal irinotecan  
24 with concomitant systemic therapy, an additional patient is enrolled to replace the withdrawn patient.

#### 30 **Statistical analyses**

31 All patients who complete at least one cycle of intraperitoneal irinotecan (75 mg) with concomitant  
32 systemic therapy will be included in the analyses. Categorical variables will be presented as n (%) and  
33 compared with the Chi-square test. Continuous variables will be presented as mean  $\pm$  standard  
34 deviation or median (interquartile range), depending on distribution. Paired data will be compared  
35 with the paired t-test or Wilcoxon signed rank test, depending on distribution. Unpaired data will be  
36 compared with the unpaired t-test or Kruskal Wallis test, depending on distribution. A p value <0.05  
37 will be considered statistically significant. Correction for multiple testing will be applied if necessary.  
38 Statistical analyses will be performed with SPSS (version 25.0, Armonk, NY, United States).

#### 45 Analysis of primary study parameter(s)

46  
47  
48 The overall survival is calculated from (a) the interval from diagnosis of peritoneal metastases until  
49 death or last follow-up; (b) the interval from the first day of the first cycle until death or last follow-  
50 up). Overall survival will be presented with the Kaplan Meier method, and subgroups (e.g. stratification  
51 based on the presence of systemic metastases or peritoneal carcinomatosis index) will be compared  
52 with the log rank test.

#### 57 Analysis of secondary study parameter(s)

- 1  
2  
3  
4  
5  
6  
7  
8  
9  
10  
11  
12  
13  
14  
15  
16  
17  
18  
19  
20  
21  
22  
23  
24  
25  
26  
27  
28  
29  
30  
31  
32  
33  
34  
35  
36  
37  
38  
39  
40  
41  
42  
43  
44  
45  
46  
47  
48  
49  
50  
51  
52  
53  
54  
55  
56  
57  
58  
59  
60
- Progression-free survival (calculated from the interval from the start of trial treatment until first evidence of intraperitoneal and/or systemic disease progression or last follow-up) will be presented with the Kaplan Meier method, and subgroups (e.g. stratification based on the presence of systemic metastases or PCI) will be compared with the log rank test.
  - Toxicity, defined as the number of patients who experience / the total number of Common Terminology Criteria for Adverse Events (CTCAE, version 5.0) grade 3-5 adverse events, measured up to four weeks after trial treatment. Given the non-randomized design of the study, these analyses will be exploratory and results will be presented as n (%). Differences in subgroups (e.g. stratification based on the presence of systemic metastases or peritoneal carcinomatosis index) will be compared with the unpaired t-test or Kruskal Wallis test, depending on distribution.
  - Patient reported outcomes (PROs) during trial treatment, assessed with the EQ-5D-5L, EORTC QLQ-C30 and EORTC QLQ-CR29 at baseline, one week after the first cycle, one week after the fourth cycle, one week after the eighth cycle, and one week after the twelfth cycle, will be analyzed according to the corresponding manuals (37-39). Given the novelty of the trial treatment, no a priori hypotheses are defined for PRO analyses. Therefore, PRO assessment will be explorative, providing the mean  $\pm$  standard deviation of each PRO category at each time-point. Linear Mixed Modelling analyses will be performed to compare differential effects over time and scores at each time-point, with the use of maximum likelihood estimation and an unstructured covariance matrix with a two-level structure (i.e. repeated time-points [lower level], patients [higher level]). To correct for multiple testing, a pragmatically chosen  $p < 0.01$  is considered statistically significant. In case of statistically significant differences, clinical relevance is determined by a Cohen's D  $> 0.500$ .
  - Healthcare costs and costs due to productivity losses during trial treatment will be assessed with the iMTA Medical Consumption Questionnaire and iMTA Productivity Cost Questionnaire at baseline, one week after the first cycle, one week after the fourth cycle, one week after the eighth cycle, and one week after the twelfth cycle. An overview of the total costs of trial treatment (1, per protocol health-care costs; 2, additional health-care costs; 3, costs due to productivity losses) is established according to the Dutch Manual for Cost Analysis in Healthcare (40, 41).
  - Tumor marker fluctuations during trial treatment will be assessed by carcino-embryonic antigen (CEA) analysis before each subsequent cycle. Given the novelty of the trial treatment, no a priori hypotheses are defined. Linear Mixed Modeling analyses will be performed to compare differential effects over time and scores at each time-point, with the use of maximum likelihood estimation and an unstructured covariance matrix with a two-level structure (i.e.



repeated time-points [lower level], patients [higher level]). To correct for multiple testing, a pragmatically chosen  $p < 0.01$  is considered statistically significant.

- Feasibility of trial treatment is assessed through completion of twelve cycles of trial treatment, required dose reductions, and reasons for discontinuation. These results are presented as n (%);
- Radiological response (according to radiological PCI and RECIST (39)) during and after trial treatment will be assessed by thoracoabdominal CT at baseline, after the fourth cycle, after the eighth cycle, and after the twelfth cycle. These results are presented as n (%);
- To further investigate the pharmacokinetics of intraperitoneal irinotecan, peritoneal fluid and peripheral blood samples will be withdrawn at several time points during the first and fourth cycle. The maximum plasma concentration ( $C_{maxp}$ ), the time to maximum plasma concentration ( $T_{maxp}$ ), plasma area under the curve ( $AUC_p$ ), maximum intraperitoneal concentration ( $C_{maxip}$ ), the time to maximum intraperitoneal concentration ( $T_{maxip}$ ), intraperitoneal area under the curve ( $AUC_{ip}$ ) of irinotecan (plasma only) and SN-38 (plasma and peritoneal fluid) will be determined.

### Recruitment

The study commenced in November 2022 and the first patients were enrolled in December 2022. It is expected to complete accrual within 2 years. To generate more awareness and to increase referrals of potential study candidates, a short Dutch summary of the study will be published in *The Dutch Journal for Oncology* (NTvO in Dutch). Further strategies to optimize accrual have not been defined *a priori*.

### Data collection and data management

Outcomes are collected in all patients who completed at least one treatment cycle. All data are prospectively collected by a local investigator in each study center using standardized electronic case report forms linked to an ISO 27001 certified central study database (De Research Manager, Deventer, the Netherlands). This ISO 27001 certified system optimizes data quality by standardized data entry, coding, security and storage.

### Data monitoring

Interim analyses are performed by principal investigators and trial coordinators four weeks after the first chemotherapy cycle of the 20<sup>th</sup> included patient and after the second chemotherapy cycle of the 43<sup>th</sup> patient, after half of the study procedures and systemic cycles have been performed and applied. These analyses will only focus on the safety aspect. The study may be prematurely terminated by the sponsor if there is evidence of an unacceptable risk for study patients. The sponsor will notify all

1  
2  
3 concerned investigators, the medical ethics committee and regulatory authorities of the decision to  
4 terminate the study.  
5

### 6 7 **Serious adverse events (SAEs) and suspected unexpected serious adverse reaction (SUSARs)**

8  
9 The investigator will report all SAEs and SUSARs to the sponsor without undue delay after obtaining  
10 knowledge of the events. The sponsor will report the SAEs and SUSARs through the web portal  
11 *ToetsingOnline* to the accredited METC that approved the protocol, within 7 days of first knowledge  
12 for SAEs or SUSARs that result in death or are life threatening followed by a period of maximum of 8  
13 days to complete the initial preliminary report. All other SAEs and SUSARS will be reported within a  
14 period of maximum 15 days after the sponsor has first knowledge of the serious adverse events.  
15  
16  
17  
18

### 19 **Auditing**

20  
21 Auditing is performed by independent qualified monitors of the study centers. The study is considered  
22 a low-risk study according to the brochure 'Kwaliteitsborging mensgebonden onderzoek 2.0' by the  
23 Dutch Federation of University Medical Centers.  
24  
25  
26  
27  
28  
29  
30  
31  
32  
33  
34  
35  
36  
37  
38  
39  
40  
41  
42  
43  
44  
45  
46  
47  
48  
49  
50  
51  
52  
53  
54  
55  
56  
57  
58  
59  
60

## Ethics and dissemination

### Research ethics approval

The present study is approved by a central ethics committee (MEC-U, Nieuwegein, Netherlands, number R22.052) and the institutional review boards of both study centers.

### Protocol amendments

Important modifications to the study protocol need to be authorized by the central ethics committee. After authorization, these modifications are communicated to the Dutch competent authority, the institutional review boards of both study centers, all investigators, study registries and patients (if required by the central ethics committee).

### Informed consent

Patients are enrolled by their treating physician and provide written informed consent. Patients are able to consent to questionnaires and participation in translational side studies separately.

### Confidentiality

Personal data of patients is collected and processed in strict adherence to the Dutch law.

### Access to data

All authors have access to the final dataset, without any contractual agreements that limit access.

### Ancillary or post-study care

The Catharina Hospital is insured to cover harms caused by study participation and extends its insurance to any participating hospital. After trial treatment is stopped, patients will be treated according to Dutch guidelines, as aforementioned in section "*response evaluation*".

### Dissemination policy

Study results will be submitted for publication in peer-reviewed medical journals and presented to patients, healthcare professionals and the public, during (inter)national meetings. Authorship eligibility guidelines are not defined a priori. The full study protocol and the Dutch informed consent form are

1  
2  
3 made available upon written request to the corresponding author. After study completion, the  
4 participant-level dataset and statistical code will be made available upon reasonable request.  
5  
6  
7  
8

## 9 Discussion

10  
11 In this single-arm, open-label, phase II, patients with unresectable colorectal peritoneal metastases  
12 are treated with concomitant intraperitoneal and systemic cytotoxic therapy. The primary objective of  
13 the study is to assess overall survival (OS) after treatment with intraperitoneal irinotecan with  
14 concomitant mFOLFOX4 and bevacizumab. Secondary objectives are to assess progression-free  
15 survival (PFS), safety, patient reported outcomes (PRO's), costs, feasibility and pharmacokinetic  
16 parameters of intraperitoneal irinotecan with concomitant mFOLFOX4 and bevacizumab.  
17  
18  
19  
20

21  
22 During this study, ascites and peritoneal biopsy samples will be collected and processed for  
23 translational research purposes. These samples will be used to establish organoids, in order to study  
24 drug response and resistance ex vivo in detail. This might aid in improved patient selection for both  
25 palliative and curative treatments, as well as enable a more personalized treatment approach (42).  
26  
27  
28

29  
30 Multiple studies have studied the effect of another strategy to apply chemotherapy intraperitoneally:  
31 pressurized intraperitoneal aerosol chemotherapy (PIPAC) (15, 43, 44). In contrast to PIPAC, the  
32 intraperitoneal chemotherapy administered in this study is applied simultaneously with systemic  
33 chemotherapy without the need for complex (and expensive) devices or surgery. Furthermore, in  
34 comparison to PIPAC, INTERACT treatment has the potential benefit of exposing tumor cells to the  
35 cytotoxic agent much more frequent and for a much longer timespan (33)  
36  
37  
38  
39

40  
41 To the best of our knowledge, after the INTERACT study, this is only the second study in patients with  
42 peritoneal metastases of colorectal origin that combines standard of care systemic chemotherapy with  
43 intraperitoneally administered chemotherapy. As such, the present study will provide essential  
44 information about overall survival and progression-free survival, as well as on safety, feasibility, costs  
45 and PROs of treatment with intraperitoneal irinotecan, and will provide a framework for the  
46  
47  
48  
49  
50  
51  
52  
53  
54  
55  
56  
57  
58  
59  
60  
61  
62  
63  
64  
65  
66  
67  
68  
69  
70  
71  
72  
73  
74  
75  
76  
77  
78  
79  
80  
81  
82  
83  
84  
85  
86  
87  
88  
89  
90  
91  
92  
93  
94  
95  
96  
97  
98  
99  
100  
101  
102  
103  
104  
105  
106  
107  
108  
109  
110  
111  
112  
113  
114  
115  
116  
117  
118  
119  
120  
121  
122  
123  
124  
125  
126  
127  
128  
129  
130  
131  
132  
133  
134  
135  
136  
137  
138  
139  
140  
141  
142  
143  
144  
145  
146  
147  
148  
149  
150  
151  
152  
153  
154  
155  
156  
157  
158  
159  
160  
161  
162  
163  
164  
165  
166  
167  
168  
169  
170  
171  
172  
173  
174  
175  
176  
177  
178  
179  
180  
181  
182  
183  
184  
185  
186  
187  
188  
189  
190  
191  
192  
193  
194  
195  
196  
197  
198  
199  
200  
201  
202  
203  
204  
205  
206  
207  
208  
209  
210  
211  
212  
213  
214  
215  
216  
217  
218  
219  
220  
221  
222  
223  
224  
225  
226  
227  
228  
229  
230  
231  
232  
233  
234  
235  
236  
237  
238  
239  
240  
241  
242  
243  
244  
245  
246  
247  
248  
249  
250  
251  
252  
253  
254  
255  
256  
257  
258  
259  
260  
261  
262  
263  
264  
265  
266  
267  
268  
269  
270  
271  
272  
273  
274  
275  
276  
277  
278  
279  
280  
281  
282  
283  
284  
285  
286  
287  
288  
289  
290  
291  
292  
293  
294  
295  
296  
297  
298  
299  
300  
301  
302  
303  
304  
305  
306  
307  
308  
309  
310  
311  
312  
313  
314  
315  
316  
317  
318  
319  
320  
321  
322  
323  
324  
325  
326  
327  
328  
329  
330  
331  
332  
333  
334  
335  
336  
337  
338  
339  
340  
341  
342  
343  
344  
345  
346  
347  
348  
349  
350  
351  
352  
353  
354  
355  
356  
357  
358  
359  
360  
361  
362  
363  
364  
365  
366  
367  
368  
369  
370  
371  
372  
373  
374  
375  
376  
377  
378  
379  
380  
381  
382  
383  
384  
385  
386  
387  
388  
389  
390  
391  
392  
393  
394  
395  
396  
397  
398  
399  
400  
401  
402  
403  
404  
405  
406  
407  
408  
409  
410  
411  
412  
413  
414  
415  
416  
417  
418  
419  
420  
421  
422  
423  
424  
425  
426  
427  
428  
429  
430  
431  
432  
433  
434  
435  
436  
437  
438  
439  
440  
441  
442  
443  
444  
445  
446  
447  
448  
449  
450  
451  
452  
453  
454  
455  
456  
457  
458  
459  
460  
461  
462  
463  
464  
465  
466  
467  
468  
469  
470  
471  
472  
473  
474  
475  
476  
477  
478  
479  
480  
481  
482  
483  
484  
485  
486  
487  
488  
489  
490  
491  
492  
493  
494  
495  
496  
497  
498  
499  
500  
501  
502  
503  
504  
505  
506  
507  
508  
509  
510  
511  
512  
513  
514  
515  
516  
517  
518  
519  
520  
521  
522  
523  
524  
525  
526  
527  
528  
529  
530  
531  
532  
533  
534  
535  
536  
537  
538  
539  
540  
541  
542  
543  
544  
545  
546  
547  
548  
549  
550  
551  
552  
553  
554  
555  
556  
557  
558  
559  
560  
561  
562  
563  
564  
565  
566  
567  
568  
569  
570  
571  
572  
573  
574  
575  
576  
577  
578  
579  
580  
581  
582  
583  
584  
585  
586  
587  
588  
589  
590  
591  
592  
593  
594  
595  
596  
597  
598  
599  
600  
601  
602  
603  
604  
605  
606  
607  
608  
609  
610  
611  
612  
613  
614  
615  
616  
617  
618  
619  
620  
621  
622  
623  
624  
625  
626  
627  
628  
629  
630  
631  
632  
633  
634  
635  
636  
637  
638  
639  
640  
641  
642  
643  
644  
645  
646  
647  
648  
649  
650  
651  
652  
653  
654  
655  
656  
657  
658  
659  
660  
661  
662  
663  
664  
665  
666  
667  
668  
669  
670  
671  
672  
673  
674  
675  
676  
677  
678  
679  
680  
681  
682  
683  
684  
685  
686  
687  
688  
689  
690  
691  
692  
693  
694  
695  
696  
697  
698  
699  
700  
701  
702  
703  
704  
705  
706  
707  
708  
709  
710  
711  
712  
713  
714  
715  
716  
717  
718  
719  
720  
721  
722  
723  
724  
725  
726  
727  
728  
729  
730  
731  
732  
733  
734  
735  
736  
737  
738  
739  
740  
741  
742  
743  
744  
745  
746  
747  
748  
749  
750  
751  
752  
753  
754  
755  
756  
757  
758  
759  
760  
761  
762  
763  
764  
765  
766  
767  
768  
769  
770  
771  
772  
773  
774  
775  
776  
777  
778  
779  
780  
781  
782  
783  
784  
785  
786  
787  
788  
789  
790  
791  
792  
793  
794  
795  
796  
797  
798  
799  
800  
801  
802  
803  
804  
805  
806  
807  
808  
809  
810  
811  
812  
813  
814  
815  
816  
817  
818  
819  
820  
821  
822  
823  
824  
825  
826  
827  
828  
829  
830  
831  
832  
833  
834  
835  
836  
837  
838  
839  
840  
841  
842  
843  
844  
845  
846  
847  
848  
849  
850  
851  
852  
853  
854  
855  
856  
857  
858  
859  
860  
861  
862  
863  
864  
865  
866  
867  
868  
869  
870  
871  
872  
873  
874  
875  
876  
877  
878  
879  
880  
881  
882  
883  
884  
885  
886  
887  
888  
889  
890  
891  
892  
893  
894  
895  
896  
897  
898  
899  
900  
901  
902  
903  
904  
905  
906  
907  
908  
909  
910  
911  
912  
913  
914  
915  
916  
917  
918  
919  
920  
921  
922  
923  
924  
925  
926  
927  
928  
929  
930  
931  
932  
933  
934  
935  
936  
937  
938  
939  
940  
941  
942  
943  
944  
945  
946  
947  
948  
949  
950  
951  
952  
953  
954  
955  
956  
957  
958  
959  
960  
961  
962  
963  
964  
965  
966  
967  
968  
969  
970  
971  
972  
973  
974  
975  
976  
977  
978  
979  
980  
981  
982  
983  
984  
985  
986  
987  
988  
989  
990  
991  
992  
993  
994  
995  
996  
997  
998  
999  
1000

### Author affiliations

<sup>1</sup> Department of Surgery, Catharina Hospital, Eindhoven, the Netherlands

<sup>2</sup> Department of Medical Oncology, Erasmus MC Cancer Institute, Rotterdam, the Netherlands

<sup>3</sup> Department of Medical Oncology, Catharina Hospital, Eindhoven, the Netherlands

<sup>4</sup> Department of Surgical Oncology, Erasmus MC Cancer Institute, Rotterdam, the Netherlands

<sup>5</sup> Department of Radiology, Catharina Hospital, Eindhoven, the Netherlands

<sup>6</sup> Department of Hospital Pharmacy, Erasmus MC, Rotterdam, Zuid-Holland, the Netherlands

<sup>7</sup> Department of Surgical Oncology and Utrecht Platform for Organoid Technology, UMC Utrecht Cancer Centre, Utrecht, the Netherlands

<sup>8</sup> Department of Research and Development, Netherlands Comprehensive Cancer Organisation, Utrecht, the Netherlands

<sup>9</sup> School for Oncology and Reproduction, GROW, Maastricht, the Netherlands

### Collaborators

Dutch Peritoneal Oncology Group (DPOG); Dutch Colorectal Cancer Group (DCCG).

### Author Contributions

TBMvdH and NADG are the coordinating investigators. VCJvdV, RJL, TBMvdH, RJFB, IvH, GJMC, SWN, IHJTdH and JWAB are the local investigators of the first study center. NADG, SLWK, EvM, CV, RHJM are the local investigators of the second study center. SK is the study pharmacologist supervising the pharmacokinetic analyses. JN is the study radiologist performing the central radiological review. SLWK is responsible for translational research on blood. OK is responsible for translational research on ascites and peritoneal lavage. JWAB is the principal investigator. VCJvdV, NADG, RJL, RHJM, and JWAB made substantial contributions to the conception and design of the study, drafted the protocol and drafted the manuscript. IEGvH, GJMC, IHJTdH, SWN, OK, SK, CV, TBMvdH and EvM made substantial contributions to conception and design of the study and critically revised the protocol and the manuscript for important intellectual content. All authors gave final approval of the version to be published and agree to be accountable for all aspects of the work.

1  
2  
3 **Funding**  
4

5 This study is supported by the Catharina Research Foundation (unrestricted grant, grant number CZE-  
6 2022.08).  
7  
8

9 **Competing interest**  
10

11 None to declare  
12  
13

14 **Patient consent for publication**  
15

16 Not required  
17  
18  
19  
20  
21  
22  
23  
24  
25  
26  
27  
28  
29  
30  
31  
32  
33  
34  
35  
36  
37  
38  
39  
40  
41  
42  
43  
44  
45  
46  
47  
48  
49  
50  
51  
52  
53  
54  
55  
56  
57  
58  
59  
60

For peer review only

## References

1. Lurvink RJ, Bakkers C, Rijken A, van Erning FN, Nienhuijs SW, Burger JW, et al. Increase in the incidence of synchronous and metachronous peritoneal metastases in patients with colorectal cancer: A nationwide study. *Eur J Surg Oncol*. 2021;47(5):1026-33.
2. van Gestel YR, de Hingh IH, van Herk-Sukel MP, van Erning FN, Beerepoot LV, Wijsman JH, et al. Patterns of metachronous metastases after curative treatment of colorectal cancer. *Cancer epidemiology*. 2014;38(4):448-54.
3. van de Vlasakker VC, Lurvink RJ, Cashin PH, Ceelen W, Deraco M, Goéré D, et al. The impact of PRODIGE 7 on the current worldwide practice of CRS-HIPEC for colorectal peritoneal metastases: A web-based survey and 2021 statement by Peritoneal Surface Oncology Group International (PSOGI). *European Journal of Surgical Oncology*. 2021;47(11):2888-92.
4. Verwaal VJ, van Ruth S, de Bree E, van Slooten GW, van Tinteren H, Boot H, et al. Randomized trial of cytoreduction and hyperthermic intraperitoneal chemotherapy versus systemic chemotherapy and palliative surgery in patients with peritoneal carcinomatosis of colorectal cancer. *Journal of clinical oncology*. 2003;21(20):3737-43.
5. Bakkers C, Lurvink RJ, Rijken A, Nienhuijs SW, Kok NF, Creemers GJ, et al. Treatment Strategies and Prognosis of Patients With Synchronous or Metachronous Colorectal Peritoneal Metastases: A Population-Based Study. *Ann Surg Oncol*. 2021;28(13):9073-83.
6. Jacquet P, Sugarbaker P. Current methodologies for clinical assessment of patients with peritoneal carcinomatosis. *Journal of Experimental & Clinical Cancer Research*. 1996;15(1):49-58.
7. Simkens GA, Rovers KP, Nienhuijs SW, de Hingh IH. Patient selection for cytoreductive surgery and HIPEC for the treatment of peritoneal metastases from colorectal cancer. *Cancer management and research*. 2017:259-66.
8. Jacquet P, Sugarbaker PH. Peritoneal-plasma barrier. *Cancer treatment and research*. 1996;82:53-64.
9. Flessner MF. The transport barrier in intraperitoneal therapy. *American Journal of Physiology-Renal Physiology*. 2005;288(3):F433-F42.
10. Al-Quteimat OM, Al-Badaineh MA. Intraperitoneal chemotherapy: rationale, applications, and limitations. *Journal of Oncology Pharmacy Practice*. 2014;20(5):369-80.
11. Averbach AM, Sugarbaker PH. Methodologic considerations in treatment using intraperitoneal chemotherapy. *Peritoneal carcinomatosis: principles of management*. 1996:289-309.
12. Dedrick RL, Myers CE, Bungay PM, DeVita V. Pharmacokinetic rationale for peritoneal drug administration. *Cancer Treat Rep*. 1978;62:1-13.
13. Guchelaar NA, Noordman BJ, Koolen SL, Mostert B, Madsen EV, Burger JW, et al. Intraperitoneal Chemotherapy for Unresectable Peritoneal Surface Malignancies. *Drugs*. 2023:1-22.
14. Rovers KP, Wassenaar EC, Lurvink RJ, Creemers G-JM, Burger JW, Los M, et al. Pressurized intraperitoneal aerosol chemotherapy (oxaliplatin) for unresectable colorectal peritoneal metastases: a multicenter, single-arm, phase II trial (CRC-PIPAC). *Annals of Surgical Oncology*. 2021:1-16.
15. Lurvink RJ, Rovers KP, Nienhuijs SW, Creemers G-J, Burger JW, de Hingh IH. Pressurized intraperitoneal aerosol chemotherapy with oxaliplatin (PIPAC-OX) in patients with colorectal peritoneal metastases—a systematic review. *Journal of Gastrointestinal Oncology*. 2021;12(Suppl 1):S242.
16. De Boer NL, Brandt-Kerkhof AR, Madsen EV, Diepeveen M, Van Meerten E, Van Eerden RA, et al. Concomitant intraperitoneal and systemic chemotherapy for extensive peritoneal metastases of colorectal origin: protocol of the multicentre, open-label, phase I, dose-escalation INTERACT trial. *BMJ open*. 2019;9(12):e034508.
17. Yan TD, Cao CQ, Munkholm-Larsen S. A pharmacological review on intraperitoneal chemotherapy for peritoneal malignancy. *World Journal of Gastrointestinal Oncology*. 2010;2(2):109.

18. Mathijssen RH, van Alphen RJ, Verweij J, Loos WJ, Nooter K, Stoter G, et al. Clinical pharmacokinetics and metabolism of irinotecan (CPT-11). *Clinical cancer research*. 2001;7(8):2182-94.
19. Ahn B-J, Choi MK, Park YS, Lee J, Park SH, Park JO, et al. Population pharmacokinetics of CPT-11 (irinotecan) in gastric cancer patients with peritoneal seeding after its intraperitoneal administration. *European journal of clinical pharmacology*. 2010;66:1235-45.
20. Choi MK, Ahn B-J, Yim D-S, Park YS, Kim S, Sohn TS, et al. Phase I study of intraperitoneal irinotecan in patients with gastric adenocarcinoma with peritoneal seeding. *Cancer chemotherapy and pharmacology*. 2011;67:5-11.
21. Maruyama M, Toukairin Y, Baba H, Kure N, Nagahama T, Ebuchi M. Pharmacokinetic study of the intraperitoneal administration of CPT-11 for patients with peritoneal seedings of gastric and colonic cancers. *Gan to kagaku ryoho Cancer & chemotherapy*. 2001;28(11):1505-7.
22. Matsui A, Okuda M, Tsujitsuka K, Enomoto K, Maruyama K. Pharmacology of intraperitoneal CPT-11. *Surgical Oncology Clinics*. 2003;12(3):795-811.
23. Saltz LB, Cox JV, Blanke C, Rosen LS, Fehrenbacher L, Moore MJ, et al. Irinotecan plus fluorouracil and leucovorin for metastatic colorectal cancer. *New England Journal of Medicine*. 2000;343(13):905-14.
24. de Man FM, Goey AK, van Schaik RH, Mathijssen RH, Bins S. Individualization of irinotecan treatment: a review of pharmacokinetics, pharmacodynamics, and pharmacogenetics. *Clinical pharmacokinetics*. 2018;57:1229-54.
25. Guichard S, Chatelut E, Lochon I, Bugat R, Mahjoubi M, Canal P. Comparison of the pharmacokinetics and efficacy of irinotecan after administration by the intravenous versus intraperitoneal route in mice. *Cancer chemotherapy and pharmacology*. 1998;42:165-70.
26. Hribaschek A, Kuhn R, Pross M, Meyer F, Fahlke J, Ridwelski K, et al. Intraperitoneal versus intravenous CPT-11 given intra- and postoperatively for peritoneal carcinomatosis in a rat model. *Surgery today*. 2006;36:57-62.
27. Nagahama T, Maruyama M, Goseki N. Intraperitoneal administration of CPT-11 in rats--experimental study for pharmacokinetics. *Gan to Kagaku ryoho Cancer & Chemotherapy*. 2000;27(12):1866-9.
28. Turcotte S, Sideris L, Younan R, Drolet P, Dubé P. Pharmacokinetics of intraperitoneal irinotecan in a pig model. *Journal of surgical oncology*. 2010;101(7):637-42.
29. Alberts DS, Liu P, Hannigan EV, O'Toole R, Williams SD, Young JA, et al. Intraperitoneal cisplatin plus intravenous cyclophosphamide versus intravenous cisplatin plus intravenous cyclophosphamide for stage III ovarian cancer. *New England Journal of Medicine*. 1996;335(26):1950-5.
30. Armstrong DK, Bundy B, Wenzel L, Huang HQ, Baergen R, Lele S, et al. Intraperitoneal cisplatin and paclitaxel in ovarian cancer. *New England Journal of Medicine*. 2006;354(1):34-43.
31. Speyer J, editor *The rationale behind intraperitoneal chemotherapy in gastrointestinal malignancies*. *Seminars in Oncology*; 1985.
32. Tewari D, Java JJ, Salani R, Armstrong DK, Markman M, Herzog T, et al. Long-term survival advantage and prognostic factors associated with intraperitoneal chemotherapy treatment in advanced ovarian cancer: a gynecologic oncology group study. *Obstetrical & Gynecological Survey*. 2015;70(8):505-6.
33. R. van Eerden NdB, J. van Kooten, C. Bakkers, M. Dietz, G-J. Creemers, S. Buijs, R. Bax, F. de Man, R. Lurvink, A. Brandt-Kerkhof, E. van Meerten, S. Koolen, I. de Hingh, C. Verhoef, R. Mathijssen, J.W.A. Burger. Phase I study of intraperitoneal irinotecan combined with palliative systemic chemotherapy in patients with colorectal peritoneal metastases. *British Journal of Surgery*. 2023(in press).
34. Chan A-W, Tetzlaff JM, Altman DG, Laupacis A, Gøtzsche PC, Krleža-Jerić K, et al. SPIRIT 2013 statement: defining standard protocol items for clinical trials. *Annals of internal medicine*. 2013;158(3):200-7.



- 1  
2  
3 35. Hulshof EC, de With M, de Man FM, Creemers G-J, Deiman BA, Swen JJ, et al. UGT1A1  
4 genotype-guided dosing of irinotecan: a prospective safety and cost analysis in poor metaboliser  
5 patients. *European Journal of Cancer*. 2022;162:148-57.  
6 36. Nederland VKG. Landelijke werkgroep Gastrointestinale tumoren. Landelijke richtlijn erfelijke  
7 darmkanker Versie.1.  
8 37. Fayers P, Aaronson NK, Bjordal K, Sullivan M. EORTC QLQ-C30 scoring manual: European  
9 Organisation for Research and Treatment of Cancer; 1995.  
10 38. Foundation ER. EQ-5D-5L user guide. EuroQol Research Foundation Rotterdam, The  
11 Netherlands; 2019.  
12 39. Whistance R, Conroy T, Chie W, Costantini A, Sezer O, Koller M, et al. Clinical and  
13 psychometric validation of the EORTC QLQ-CR29 questionnaire module to assess health-related  
14 quality of life in patients with colorectal cancer. *European journal of cancer*. 2009;45(17):3017-26.  
15 40. Kanters TA, Bouwmans CA, van der Linden N, Tan SS, Hakkaart-van Roijen L. Update of the  
16 Dutch manual for costing studies in health care. *PloS one*. 2017;12(11):e0187477.  
17 41. Tan SS, Bouwmans CA, Rutten FF, Hakkaart-van Roijen L. Update of the Dutch manual for  
18 costing in economic evaluations. *International journal of technology assessment in health care*.  
19 2012;28(2):152-8.  
20 42. Lau HCH, Kranenburg O, Xiao H, Yu J. Organoid models of gastrointestinal cancers in basic  
21 and translational research. *Nat Rev Gastroenterol Hepatol*. 2020;17(4):203-22.  
22 43. Sgarbura O, Eveno C, Alyami M, Bakrin N, Guiral DC, Ceelen W, et al. Consensus statement  
23 for treatment protocols in pressurized intraperitoneal aerosol chemotherapy (PIPAC). *Pleura and*  
24 *Peritoneum*. 2022.  
25 44. Tempfer C, Giger-Pabst U, Hilal Z, Dogan A, Rezniczek GA. Pressurized intraperitoneal aerosol  
26 chemotherapy (PIPAC) for peritoneal carcinomatosis: systematic review of clinical and experimental  
27 evidence with special emphasis on ovarian cancer. *Archives of gynecology and obstetrics*.  
28 2018;298:243-57.  
29  
30  
31  
32  
33  
34  
35  
36  
37  
38  
39  
40  
41  
42  
43  
44  
45  
46  
47  
48  
49  
50  
51  
52  
53  
54  
55  
56  
57  
58  
59  
60

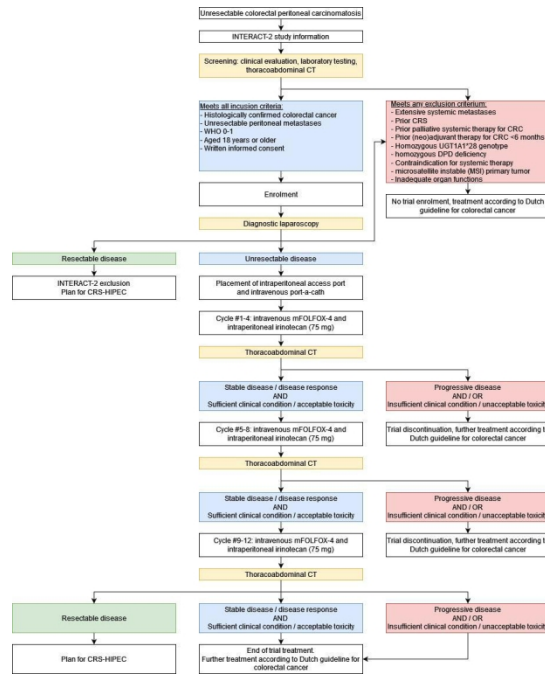

Figure 1. Study flowchart. WHO, World Health Organization performance status; CRS, cytoreductive surgery; CRC, HIPEC, hyperthermic intraperitoneal chemotherapy; colorectal cancer; DPD, dihydropyrimidine dehydrogenase.

1144x762mm (38 x 38 DPI)

1  
2  
3  
4  
5  
6  
7  
8  
9  
10  
11  
12  
13  
14  
15  
16  
17  
18  
19  
20  
21  
22  
23  
24  
25  
26  
27  
28  
29  
30  
31  
32  
33  
34  
35  
36  
37  
38  
39  
40  
41  
42  
43  
44  
45  
46

|                                          | Screening | Enrolment | Medical oncologist: intake | Diagnostic laparoscopy | Cycle #1 | Cycles #2-4 | One week after cycle #4 | Cycles #5-8 | One week after cycle #8 | Cycles #9-12 | One week after cycle #12 | Last study visit |
|------------------------------------------|-----------|-----------|----------------------------|------------------------|----------|-------------|-------------------------|-------------|-------------------------|--------------|--------------------------|------------------|
| Multidisciplinary tumor board            | X         |           |                            |                        |          |             | X                       |             | X                       |              | X                        |                  |
| Medical history                          | X         | X         | X                          |                        |          |             |                         |             |                         |              |                          |                  |
| Inclusion and exclusion criteria         | X         | X         | X                          |                        |          |             |                         |             |                         |              |                          |                  |
| Provide study information                | X         | X         | X                          |                        |          |             |                         |             |                         |              |                          |                  |
| Written informed consent                 |           | X         |                            |                        |          |             |                         |             |                         |              |                          |                  |
| Physical examination                     |           | X         | X                          |                        | X        | X           |                         | X           |                         | X            |                          |                  |
| Pre-operative screening                  |           | X         |                            |                        |          |             |                         |             |                         |              |                          |                  |
| Blood test: DPD and UGT1A1 genotype      |           | X         |                            |                        |          |             |                         |             |                         |              |                          |                  |
| Blood test: organ functions              |           | X         |                            |                        | X        | X           |                         | X           |                         | X            |                          |                  |
| Blood test: tumor marker <sup>a</sup>    |           | X         |                            |                        | X        | X           |                         | X           |                         | X            |                          |                  |
| Blood test: pregnancy <sup>b</sup>       |           | X         |                            |                        |          |             |                         |             |                         |              |                          |                  |
| Electrocardiogram                        |           | X         |                            |                        |          |             |                         |             |                         |              |                          |                  |
| Placement of port-a-cath                 |           |           |                            | X                      |          |             |                         |             |                         |              |                          |                  |
| Placement of peritoneal access port      |           |           |                            | X                      |          |             |                         |             |                         |              |                          |                  |
| Thoracoabdominal CT scan <sup>c</sup>    |           | X         |                            |                        |          |             | X                       |             | X                       |              | X                        |                  |
| Systemic chemotherapy                    |           |           |                            |                        | X        | X           |                         | X           |                         | X            |                          |                  |
| Intraperitoneal chemotherapy             |           |           |                            |                        | X        | X           |                         | X           |                         | X            |                          |                  |
| Clinical evaluation                      |           | X         | X                          |                        | X        | X           |                         | X           |                         | X            |                          | X                |
| Toxicity evaluation (CTCAE)              |           |           |                            |                        | X        | X           |                         | X           |                         | X            |                          | X                |
| Patient Reported Outcomes Questionnaires |           | X         |                            |                        | X        |             | X                       |             | X                       |              | X                        |                  |
| Costs Questionnaires                     |           | X         |                            |                        | X        |             | X                       |             | X                       |              | X                        |                  |
| Pharmacokinetics                         |           |           |                            |                        | X        |             |                         |             |                         |              |                          |                  |

|                                                                                                                                                                                                                                                                                                                                                          |  |   |  |   |   |   |   |   |   |   |   |   |
|----------------------------------------------------------------------------------------------------------------------------------------------------------------------------------------------------------------------------------------------------------------------------------------------------------------------------------------------------------|--|---|--|---|---|---|---|---|---|---|---|---|
| Progression Free Survival                                                                                                                                                                                                                                                                                                                                |  |   |  |   |   |   | X |   | X |   | X | X |
| Overall Survival                                                                                                                                                                                                                                                                                                                                         |  |   |  |   | X | X |   | X |   | X |   | X |
| Remove peritoneal access port <sup>d</sup>                                                                                                                                                                                                                                                                                                               |  |   |  |   |   |   |   |   |   |   |   | X |
| Translational Research: blood                                                                                                                                                                                                                                                                                                                            |  | X |  |   |   |   | X |   | X |   | X |   |
| Translational Research: ascites                                                                                                                                                                                                                                                                                                                          |  |   |  | X | X | X |   |   |   |   |   |   |
| <sup>a</sup> Carcino-embryonic antigen; <sup>b</sup> Only determined in women of fertile age (<55 years); <sup>c</sup> Unless already performed <6 weeks before diagnostic laparoscopy; <sup>d</sup> On patient's request;<br>CT, Computed Tomography; CTCAE, Common Terminology Criteria for Adverse Events; Marked in grey: study-specific procedures; |  |   |  |   |   |   |   |   |   |   |   |   |

Table 1: overview of study procedures

# BMJ Open

## Intraperitoneal irinotecan with concomitant FOLFOX and bevacizumab for patients with unresectable colorectal peritoneal metastases: protocol of the multicenter, open-label, phase II, INTERACT-II trial

|                                 |                                                                                                                                                                                                                                                                                                                                                                                                                                                                                                                                                                                                                                                                                                                                                                                                                                                                                                                                                                                                                                                                                                                                                                                                                                                                                                                                                                                                                                   |
|---------------------------------|-----------------------------------------------------------------------------------------------------------------------------------------------------------------------------------------------------------------------------------------------------------------------------------------------------------------------------------------------------------------------------------------------------------------------------------------------------------------------------------------------------------------------------------------------------------------------------------------------------------------------------------------------------------------------------------------------------------------------------------------------------------------------------------------------------------------------------------------------------------------------------------------------------------------------------------------------------------------------------------------------------------------------------------------------------------------------------------------------------------------------------------------------------------------------------------------------------------------------------------------------------------------------------------------------------------------------------------------------------------------------------------------------------------------------------------|
| Journal:                        | <i>BMJ Open</i>                                                                                                                                                                                                                                                                                                                                                                                                                                                                                                                                                                                                                                                                                                                                                                                                                                                                                                                                                                                                                                                                                                                                                                                                                                                                                                                                                                                                                   |
| Manuscript ID                   | bmjopen-2023-077667.R1                                                                                                                                                                                                                                                                                                                                                                                                                                                                                                                                                                                                                                                                                                                                                                                                                                                                                                                                                                                                                                                                                                                                                                                                                                                                                                                                                                                                            |
| Article Type:                   | Protocol                                                                                                                                                                                                                                                                                                                                                                                                                                                                                                                                                                                                                                                                                                                                                                                                                                                                                                                                                                                                                                                                                                                                                                                                                                                                                                                                                                                                                          |
| Date Submitted by the Author:   | 23-Nov-2023                                                                                                                                                                                                                                                                                                                                                                                                                                                                                                                                                                                                                                                                                                                                                                                                                                                                                                                                                                                                                                                                                                                                                                                                                                                                                                                                                                                                                       |
| Complete List of Authors:       | de Vlasakker, Vincent ; Catharina Ziekenhuis, Department of Surgery<br>Guchelaar, Niels; Erasmus Medical Center, Department of Medical Oncology<br>van den Heuvel, Teun; Catharina Ziekenhuis, Department of Surgery<br>Lurvink, Robin; Catharina Hospital, Department of Surgery<br>van Meerten, Esther; Erasmus MC Kanker Instituut, Department of Medical Oncology<br>Bax, Ramon; Catharina Hospital, Department of Medical Oncology<br>Creemers, Geert-Jan; Catharina Hospital, Department of Medical Oncology<br>van Hellemond, Irene; Catharina Hospital, Department of Medical Oncology<br>Brandt-Kerkhof, Alexandra; Erasmus MC, Department of Surgical Oncology<br>Madsen, Eva; Erasmus MC, Department of Surgical Oncology<br>Nederend, Joost; Catharina Hospital, Department of Radiology<br>Koolen, Stijn; Erasmus MC, Department of Medical Oncology; Erasmus MC, Department of Pharmacy<br>Nienhuijs, Simon W.; Catharina Hospital, Department of Surgery<br>Kranenburg, Onno; UMC Utrecht, Department of Surgical Oncology and Utrecht Platform for Organoid Technology<br>de Hingh, Ignace; Catharina Hospital, Department of Surgery; Maastricht University GROW School for Oncology and Reproduction<br>Verhoef, Cornelis; Erasmus MC, Department of Surgical Oncology<br>Mathijssen, Ron; Erasmus Medical Center, Department of Medical Oncology<br>Burger, Jacobus; Catharina Hospital, Department of Surgery |
| <b>Primary Subject Heading</b>: | Oncology                                                                                                                                                                                                                                                                                                                                                                                                                                                                                                                                                                                                                                                                                                                                                                                                                                                                                                                                                                                                                                                                                                                                                                                                                                                                                                                                                                                                                          |
| Secondary Subject Heading:      | Surgery                                                                                                                                                                                                                                                                                                                                                                                                                                                                                                                                                                                                                                                                                                                                                                                                                                                                                                                                                                                                                                                                                                                                                                                                                                                                                                                                                                                                                           |
| Keywords:                       | CHEMOTHERAPY, Clinical Trial, Gastrointestinal tumours < ONCOLOGY, Colorectal surgery < SURGERY                                                                                                                                                                                                                                                                                                                                                                                                                                                                                                                                                                                                                                                                                                                                                                                                                                                                                                                                                                                                                                                                                                                                                                                                                                                                                                                                   |
|                                 |                                                                                                                                                                                                                                                                                                                                                                                                                                                                                                                                                                                                                                                                                                                                                                                                                                                                                                                                                                                                                                                                                                                                                                                                                                                                                                                                                                                                                                   |

1  
2  
3  
4  
5  
6  
7  
8  
9  
10  
11  
12  
13  
14  
15  
16  
17  
18  
19  
20  
21  
22  
23  
24  
25  
26  
27  
28  
29  
30  
31  
32  
33  
34  
35  
36  
37  
38  
39  
40  
41  
42  
43  
44  
45  
46  
47  
48  
49  
50  
51  
52  
53  
54  
55  
56  
57  
58  
59  
60

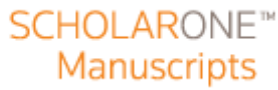

# Intraperitoneal irinotecan with concomitant FOLFOX and bevacizumab for patients with unresectable colorectal peritoneal metastases: protocol of the multicenter, open-label, phase II, INTERACT-II trial

Vincent C.J. van de Vlasakker<sup>1\*</sup>, Niels. A.D. Guchelaar<sup>2\*</sup>, Teun B.M. van den Heuvel<sup>1</sup>, Robin J. Lurvink<sup>1</sup>, Esther van Meerten<sup>2</sup>, Ramon J.F. Bax<sup>3</sup>, Geert-Jan M. Creemers<sup>3</sup>, Irene E. G. van Hellemond<sup>3</sup>, Alexandra R.M. Brandt-Kerkhof<sup>4</sup>, Eva V.E. Madsen<sup>4</sup>, Joost Nederend<sup>5</sup>, Stijn L.W. Koolen<sup>2,6</sup>, Simon W. Nienhuijs<sup>1</sup>, Onno Kranenburg<sup>7</sup>, Ignace H.J.T. de Hingh<sup>1,8,9</sup>, Cornelis Verhoef<sup>4</sup>, Ron H.J. Mathijssen<sup>4</sup>, Jacobus W.A. Burger<sup>1</sup>

\*Authors contributed equally and are joint first authors

## Corresponding author

Dr. J. (Pim) W. A. Burger, MD, PhD;  
Surgeon, Department of Surgery; Catharina Cancer Institute;  
PO Box 1350, 5602 ZA, Eindhoven, Netherlands;  
E-mail; Pim.burger@catharinaziekenhuis.nl

**Trial registration number:** NCT06003998

**Word count:** 3925

**Tables:** 1

**Figures:** 1

**Keywords:** Colorectal peritoneal metastases, intraperitoneal, irinotecan, bevacizumab, peritoneal access port

1  
2  
3  
4  
5  
6  
7  
8  
9  
10  
11  
12  
13  
14  
15  
16  
17  
18  
19  
20  
21  
22  
23  
24  
25  
26  
27  
28  
29  
30  
31  
32  
33  
34  
35  
36  
37  
38  
39  
40  
41  
42  
43  
44  
45  
46  
47  
48  
49  
50  
51  
52  
53  
54  
55  
56  
57  
58  
59  
60

For peer review only



## Abstract

**Introduction:** The peritoneum is the second most affected organ for the dissemination of colorectal cancer (CRC). Patients with colorectal peritoneal metastases (CPM) face a poor prognosis, despite the majority of patients being treated with palliative systemic therapy. The efficacy of palliative systemic therapy is limited, due to the plasma-peritoneum barrier. The poor prognosis of unresectable CPM patients has resulted in the development of new treatment strategies where systemic therapy is combined with local, intraperitoneal chemotherapy. In the recently published phase I study the maximum tolerated dose (MTD) and thus the recommended phase II dose (RP2D) of intraperitoneal Irinotecan was investigated and determined to be 75 mg. In the present study, the overall survival after treatment with 75 mg irinotecan with concomitant mFOLFOX4 and bevacizumab will be investigated.

**Materials and Methods:** In this single-arm phase II study in two Dutch tertiary referral centers, 85 patients are enrolled. Eligibility criteria are an adequate performance status and organ function, histologically confirmed microsatellite stable and unresectable CPM, no previous palliative therapy for CRC, no systemic therapy <6 months for CRC prior to enrolment and no previous cytoreductive surgery and hyperthermic intraperitoneal chemotherapy (CRS and HIPEC). Patients will undergo a diagnostic laparoscopy as standard work-up for CPM and if the peritoneal disease is considered unresectable (e.g. PCI >20, too extensive small bowel involvement), a peritoneal access port and a port-a-cath are placed for administration of intraperitoneal and intravenous chemotherapy, respectively. Patients may undergo up to 12 cycles of study treatment. Each cycle consists of intravenous mFOLFOX4 with bevacizumab and concomitant intraperitoneal irinotecan (75 mg), which is repeated every two weeks, with a maximum of 12 cycles. Modified FOLFOX-4 regimen consists of 85 mg/m<sup>2</sup> oxaliplatin plus 200 mg/m<sup>2</sup> LV and 5-FU 400 mg/m<sup>2</sup> bolus on day 1 followed by 1600 mg/m<sup>2</sup> 5-FU as a 46-h infusion. Study treatment ends after the twelfth cycle, or earlier in case of disease progression or unacceptable toxicity. The primary outcome is overall survival and key secondary outcomes are progression-free survival, safety (measured by the amount of grade ≥3 adverse events [Common Terminology Criteria for Adverse Events V5.0]), patient-reported outcomes and pharmacokinetics of irinotecan. It is hypothesized that the trial treatment will lead to a 4 month increase in overall survival; from a median of 12.2 months, to 16.2 months.

**Ethics and Dissemination:** This study is approved by the Dutch Authority (CCMO, the Hague, the Netherlands), by a central medical ethics committee (MEC-U, Nieuwegein, the Netherlands) and by the institutional research boards of both research centers. Results will be submitted for publication in peer-reviewed medical journals and presented to patients and healthcare professionals.

### Strengths and limitations of this study

- First prospective phase II study assessing the survival, safety and feasibility of treatment of Intraperitoneal irinotecan with concomitant FOLFOX and bevacizumab for patients with unresectable colorectal peritoneal metastases (CPM).
- Assessment of multiple secondary outcomes such as patient-reported outcomes, costs and the pharmacokinetics of intraperitoneally administered irinotecan.
- Translational research of the present study may provide fundamental insight in CPM.
- The INTERACT-II study may be an important step towards a more effective, life-prolonging treatment modality for this specific patient group.
- It is a non-randomized phase II study and therefore no comparison can be made to a control group.

For peer review only

## Introduction

The peritoneum is the second most common metastatic site in colorectal cancer, affecting approximately 10% of patients (1, 2). For a long time, the presence of colorectal peritoneal metastases (CPM) was considered to render the disease non-curable (3).

The introduction of cytoreductive surgery and hyperthermic intraperitoneal chemotherapy (CRS and HIPEC) resulted in improved survival in selected patients with limited colorectal peritoneal metastases as compared to palliative systemic therapy (4). However, only a small portion of patients is eligible for CRS and HIPEC, as the majority of patients have too extensive colorectal peritoneal metastases (CPM) to benefit from CRS and HIPEC (5).

The extent of peritoneal metastases is evaluated with the Peritoneal Cancer Index (PCI), which divides the abdomen in nine regions and the small bowel in four regions. Each region is given a score of 0-3 and the regions are summed up subsequently; a score of 0 reflects the absence of peritoneal metastases, while a maximum score of 39 indicates extensive disease in all regions (6). In general, CRS and HIPEC is not considered beneficial when the PCI exceeds 20 or when a macroscopic complete resection is not deemed feasible, for example in case of extensive small bowel involvement (7). The situation in which the patient has a  $PCI > 20$ , or when complete resection is deemed unfeasible, is referred to as unresectable CPM.

Currently, patients with unresectable CPM receive palliative systemic therapy or best supportive care. The prognosis of these patients is dismal, with a median overall survival of 6-8 months with best supportive care and 10-14 months with palliative systemic therapy (5). The plasma-peritoneum barrier is suggested to reduce efficacy of systemic therapy in the treatment of CPM, as compared to patients with lung or liver metastases from a colorectal origin. (8). The plasma-peritoneum barrier is a complex structure that regulates the intraperitoneal homeostasis, thus hampering an effective transportation of the systemic therapy to the peritoneal metastases(9).

By applying cytostatic therapies intraperitoneally, the traits of the plasma-peritoneum barrier can be used advantageously (9-13). Due to the limited absorption into the systemic circulation caused by the plasma-peritoneum barrier, higher intraperitoneal drug concentrations and prolonged exposure of PM to those drugs can be achieved compared to systemic administration(13).

The aforementioned CRS-HIPEC is based in part on these here described traits of the plasma-peritoneum barrier (10). In addition, different techniques, through which palliative chemotherapy can be applied intraperitoneally exist. With pressurized intraperitoneal aerosol chemotherapy (PIPAC), chemotherapy is administered as aerosol during repetitive laparoscopies, while the INTERACT I study investigated the intraperitoneal administration of chemotherapy through an intraperitoneal access port (14-16).

1  
2  
3 In addition to various techniques for the intraperitoneal application of chemotherapy, a variety of  
4 cytotoxic agents can be used (13, 17). One of the chemotherapeutic groups that has been studied and  
5 that shows promise is the group of topoisomerase inhibitors (13).  
6

7  
8 Irinotecan is a topoisomerase I inhibitor and was the chemotherapeutic agent that was studied in the  
9 INTERACT I study. Irinotecan is a prodrug and its main efficacy is attributed to its metabolite SN-38,  
10 which is 100-1000 fold more cytotoxic than irinotecan. The conversion to SN-38 takes place in both the  
11 liver and intraperitoneal space (18-24). Several studies showed that the intraperitoneal area under the  
12 curve of irinotecan and SN-38 was much higher after intraperitoneal administration than after systemic  
13 administration. Additionally, the peritoneal clearance of intraperitoneally administered irinotecan was  
14 10-fold lower than after systemic administration of irinotecan (21, 25-28).  
15  
16  
17  
18  
19  
20

21 Intraperitoneal chemotherapy, such as irinotecan, can either be applied as monotherapy, or in  
22 combination with systemic therapy. In both ovarian and gastric cancer the addition of intraperitoneal  
23 chemotherapy to systemic chemotherapy showed promising results (20, 29-32). Moreover, in ovarian  
24 cancer, a beneficial effect was proven by a large randomized controlled trial (32). These findings, in  
25 combination with the promising results of the INTERACT I study, suggest that intraperitoneal  
26 chemotherapy in addition to systemic therapy could be beneficial in patients with unresectable  
27 colorectal peritoneal metastases as well (33).  
28  
29  
30  
31  
32  
33

34  
35 The recent INTERACT study (NL63809.078.18) was a dose-escalation study and was performed to find  
36 the maximum tolerated dose (MTD) of intraperitoneal (IP) irinotecan (16). In this study, 18 patients  
37 with unresectable colorectal peritoneal metastases were treated with first-line palliative systemic  
38 therapy with FOLFOX/bevacizumab and concomitant intraperitoneal irinotecan at flat dose levels of  
39 50 mg (n=4), 75 mg (n=9), and 100 mg (n=4). For the 50 mg and 75 mg dose cohorts, no dose-limiting  
40 toxicities were observed. After two dose-limiting toxicities at the 100 mg dose level, the MTD was thus  
41 established at 75 mg.  
42  
43  
44  
45  
46

47 The INTERACT-II study is a multi-center, single-arm, phase II study, aimed to assess overall survival,  
48 progression-free survival, safety, patient reported outcomes (PRO's), costs and pharmacokinetics of  
49 75mg IP irinotecan with concomitant first-line systemic therapy (consisting of FOLFOX and  
50 bevacizumab) in patients with unresectable CPM.  
51  
52  
53  
54  
55  
56

## 57 **Methods and analysis**

58 This protocol summary follows the Standard Protocol Items: Recommendations for Interventional  
59 Trials (SPIRIT) Statement (34).  
60

## Setting

This study is a single-arm, open-label, phase II study that is performed in two large Dutch tertiary referral centers for the treatment of CPM; The Catharina Cancer Institute in Eindhoven and the Erasmus MC Cancer Institute in Rotterdam. Further tertiary referral centers may join later.

## Objectives

*The primary objective* is to explore overall survival after treatment with intraperitoneal irinotecan (75 mg) to mFOLFOX4 / bevacizumab in patients with unresectable colorectal peritoneal metastases, henceforth referred to as trial treatment.

*Secondary objectives are:*

- To assess progression-free survival (which is calculated from the interval from the start of trial treatment until first evidence of intraperitoneal and/or systemic disease progression and/or start of second-line systemic therapy, or last follow-up).
- To assess the feasibility of trial treatment; to assess the toxicity profile (defined as the number of grade 3-5 adverse events according to the Common Terminology Criteria for Adverse Events [CTCAE]) of trial treatment.
- To assess patient reported outcomes (PROs) during trial treatment.
- To assess costs of trial treatment
- To assess the nephrotoxicity, hepatotoxicity, and hematological toxicity during trial treatment.
- To assess tumor marker fluctuations during trial treatment.
- To determine the number of patients completing trial treatment, required dose reductions, and reasons for discontinuation.
- To determine the number of patients with an objective radiological response during and after trial treatment.
- To systematically collect, process, and store blood, tumor tissue and ascites for future translational research
- To determine the systemic and intraperitoneal pharmacokinetics of intraperitoneal irinotecan.

*Exploratory objectives* are to determine if, and how many patients are able to undergo salvage procedures, such as CRS and HIPEC following successful treatment with intraperitoneal irinotecan (75 mg) and concomitant palliative systemic therapy.

## Eligibility criteria

Eligibility criteria are:

- Histologically confirmed colorectal carcinoma.
- Microsatellite stable (MSS) primary tumor.
- Radiologically and clinically or pathologically confirmed unresectable colorectal peritoneal metastases (e.g. PCI >20, extensive small bowel involvement, unresectable disease due to anatomical location).
- WHO performance score of 0-1 with a life expectancy of >3 months.
- Aged 18 years or older.
- Adequate organ functions (hemoglobin of  $\geq 5$  mmol/L, neutrophil count of  $\geq 1.5 \times 10^9/L$ , platelet count of  $\geq 100 \times 10^9/L$ , serum creatinine of  $< 1.5$  x upper limit of normal [ULN], creatinine clearance of  $\geq 30$  ml/min, Bilirubin  $< 2$  x ULN and liver transaminases of  $< 5$  x ULN).
- Absence of extensive systemic metastases that are deemed to be the dominant factor determining prognosis in terms of life expectancy and performance status (e.g. no imminent threat of impaired organ functioning due to the presence of systemic metastases).
- No prior cytoreductive surgery.
- No prior palliative systemic therapy for colorectal cancer.
- No (neo)adjuvant/adjuvant systemic therapy for colorectal cancer within 6 months prior to enrollment.
- No homozygous UGT1A1\*28 genotype(35).
- No dihydropyrimidine dehydrogenase (DPD) deficiency.
- No contra-indications for the planned chemotherapy (e.g. active infection, serious concomitant disease, severe allergy), as determined by the medical oncologist.

### Study treatment

The study flowchart is presented in figure 1. The study schedule of enrollment, treatment and assessment is shown in supplementary table 1.

### Diagnostic laparoscopy and port placement

Patients who are candidates for CRS and HIPEC are discussed in a multidisciplinary oncology team meeting, after which they are scheduled for a diagnostic laparoscopy. Patients who are considered to have a high chance of unresectable CPM, based on radiological or clinical investigations, may be enrolled in the study. After enrollment, a diagnostic laparoscopy is performed to inspect the peritoneal cavity. The diagnostic laparoscopy is performed under general anesthesia. If peritoneal disease is

1  
2  
3 considered unresectable (e.g. due to PCI >20, too extensive small bowel involvement or anatomical  
4 location), two ports are placed: one regular intravenous port-a-cath for the intravenous administration  
5 of chemotherapy according to local standard of care, and one peritoneal access port for the  
6 intraperitoneal administration of chemotherapy. The peritoneal access port is placed on the fascia just  
7 above or just below the lower rib cage at the discretion of the surgeon. The catheter is tunneled and  
8 inserted into the peritoneal cavity. The tip is positioned in the pelvis. In case of adhesions during the  
9 laparoscopy that hampers the positioning of the tip in the pelvis, a different place in the peritoneal  
10 cavity may be chosen to place the tip of the catheter. Ascites (or 0.9% NaCl lavage) is collected for  
11 translational research. Patients may be discharged the same day after having received instructions for  
12 hygiene and wound care.  
13  
14  
15  
16  
17  
18  
19  
20  
21  
22

### 23 Chemotherapy

24  
25 In the absence of post-operative complications, the first cycle will start at least one week after  
26 placement of the ports, to allow for sufficient wound healing. Each cycle consists of intravenous  
27 mFOLFOX4 with bevacizumab and concomitant intraperitoneal irinotecan (75 mg). Intraperitoneal  
28 irinotecan (75 mg) will be dissolved in 1 liter NaCl 0.9% and pre-warmed to 37°C. Cycles are repeated  
29 every two weeks, with a maximum of 12 cycles. Modified FOLFOX-4 regimen consists of 85 mg/m<sup>2</sup>  
30 oxaliplatin plus 200 mg/m<sup>2</sup> LV and 5-FU 400 mg/m<sup>2</sup> bolus on day 1 followed by 1600 mg/m<sup>2</sup> 5-FU as a  
31 46-h infusion (27). In case of symptomatic ascites, the ascites will be (partly) drained through the  
32 peritoneal access port prior to the start of the therapy cycle.  
33  
34  
35  
36  
37  
38

### 39 Response evaluation

40  
41 Before each cycle, the patient is evaluated (based on clinical and biochemical parameters) by the  
42 treating medical oncologist. After every fourth cycle, a thoracoabdominal computed tomography (CT)  
43 scan is performed for response evaluation. After each CT scan, the decision to continue trial treatment  
44 is based on disease response and clinical performance:  
45  
46  
47

- 48  
49 ➤ In case of physician-determined disease progression (either intraperitoneal, systemic, or  
50 both), trial treatment is discontinued. The patient will receive second line palliative systemic  
51 treatment or best supportive care according to the Dutch national guideline for colorectal  
52 cancer (36).  
53
- 54  
55 ➤ In case of physician-determined disease response or stable disease (both intraperitoneal and  
56 systemic) but severe clinical deterioration or unacceptable toxicity to treatment, rendering the  
57 patient unsuited to continue with treatment, trial treatment is discontinued. The patient will  
58  
59  
60

1  
2  
3 receive further palliative systemic treatment or best supportive care according to the Dutch  
4 national guideline for colorectal cancer (36).

- 5  
6 ➤ In case of physician-determined disease response or stable disease (both intraperitoneal and  
7 systemic) and sufficient clinical condition and acceptable toxicity to treatment, trial treatment  
8 is continued.  
9  
10

11  
12 For all patients, study treatment ends after completing the twelfth cycle of intravenous mFOLFOX4  
13 with bevacizumab and concomitant intraperitoneal irinotecan (75 mg), regardless of response on the  
14 thoracoabdominal CT performed after the twelfth cycle. On patient's request, the peritoneal access  
15 port is removed after the last cycle of trial treatment. After the evaluation after the twelfth cycle,  
16 intraperitoneal chemotherapy will be discontinued definitively and further treatment is scheduled  
17 with the medical oncologist and will be in according to local standard of care and may include of CRS-  
18 HIPEC (36).  
19  
20  
21  
22  
23  
24  
25  
26  
27  
28  
29  
30  
31  
32  
33  
34  
35  
36  
37  
38  
39  
40  
41  
42  
43  
44  
45  
46  
47  
48  
49  
50  
51  
52  
53  
54  
55  
56  
57  
58  
59  
60



1  
2  
3  
4  
5  
6  
7  
8  
9  
10  
11  
12  
13  
14  
15  
16  
17  
18  
19  
20  
21  
22  
23  
24  
25  
26  
27  
28  
29  
30  
31  
32  
33  
34  
35  
36  
37  
38  
39  
40  
41  
42  
43  
44  
45  
46  
47  
48  
49  
50  
51  
52  
53  
54  
55  
56  
57  
58  
59  
60

Figure 1. Study flowchart. WHO, World Health Organization performance status; CRS, cytoreductive surgery; CRC, HIPEC, hyperthermic intraperitoneal chemotherapy; colorectal cancer; DPD, dihydropyrimidine dehydrogenase.

For peer review only

1  
2  
3  
4  
5  
6  
7  
8  
9  
10  
11  
12  
13  
14  
15  
16  
17  
18  
19  
20  
21  
22  
23  
24  
25  
26  
27  
28  
29  
30  
31  
32  
33  
34  
35  
36  
37  
38  
39  
40  
41  
42  
43  
44  
45  
46

Supplementary table 1: overview of study procedures

For peer review only

### Sample size

Population based studies have described an overall survival of approximately 12.2 months (5) for patients with isolated unresectable colorectal peritoneal metastases treated with palliative systemic chemotherapy. Based on clinical experience, expert consensus and the preliminary results of the INTERACT study, we hypothesize that the study treatment will result in a median overall survival of at least 16.2 months. This entails an expected increase of 4 months in the study population in comparison to the general population of patients with unresectable CPM. To render this assumption plausible, with a power of 80% and a type I error rate of 0.05, a sample size of 85 is needed.

Given the previous experience with the trial treatment from the INTERACT study and the low expected additional toxicity of intraperitoneal irinotecan, the investigators consider it reasonable and safe to expose 85 patients to trial treatment.

### Replacement of individual patients

If a patient is withdrawn from the study prior to completing one cycle of intraperitoneal irinotecan with concomitant systemic therapy, an additional patient is enrolled to replace the withdrawn patient.

### Statistical analyses

All patients who complete at least one cycle of intraperitoneal irinotecan (75 mg) with concomitant systemic therapy will be included in the analyses. Categorical variables will be presented as n (%) and compared with the Chi-square test. Continuous variables will be presented as mean  $\pm$  standard deviation or median (interquartile range), depending on distribution. Paired data will be compared with the paired t-test or Wilcoxon signed rank test, depending on distribution. Unpaired data will be compared with the unpaired t-test or Kruskal Wallis test, depending on distribution. A p value  $<0.05$  will be considered statistically significant. Correction for multiple testing will be applied if necessary. Statistical analyses will be performed with SPSS (version 25.0, Armonk, NY, United States).

### Analysis of primary study parameter(s)

The overall survival is calculated from (a) the interval from diagnosis of peritoneal metastases until death or last follow-up; (b) the interval from the first day of the first cycle until death or last follow-up). Overall survival will be presented with the Kaplan Meier method, and subgroups (e.g. stratification based on the presence of systemic metastases or peritoneal carcinomatosis index) will be compared with the log rank test.

### Analysis of secondary study parameter(s)

- 1  
2  
3  
4  
5  
6  
7  
8  
9  
10  
11  
12  
13  
14  
15  
16  
17  
18  
19  
20  
21  
22  
23  
24  
25  
26  
27  
28  
29  
30  
31  
32  
33  
34  
35  
36  
37  
38  
39  
40  
41  
42  
43  
44  
45  
46  
47  
48  
49  
50  
51  
52  
53  
54  
55  
56  
57  
58  
59  
60
- Progression-free survival (calculated from the interval from the start of trial treatment until first evidence of intraperitoneal and/or systemic disease progression or last follow-up) will be presented with the Kaplan Meier method, and subgroups (e.g. stratification based on the presence of systemic metastases or PCI) will be compared with the log rank test.
  - Toxicity, defined as the number of patients who experience / the total number of Common Terminology Criteria for Adverse Events (CTCAE, version 5.0) grade 3-5 adverse events, measured up to four weeks after trial treatment. Given the non-randomized design of the study, these analyses will be exploratory and results will be presented as n (%). Differences in subgroups (e.g. stratification based on the presence of systemic metastases or peritoneal carcinomatosis index) will be compared with the unpaired t-test or Kruskal Wallis test, depending on distribution.
  - Patient reported outcomes (PROs) during trial treatment, assessed with the EQ-5D-5L, EORTC QLQ-C30 and EORTC QLQ-CR29 at baseline, one week after the first cycle, one week after the fourth cycle, one week after the eighth cycle, and one week after the twelfth cycle, will be analyzed according to the corresponding manuals (37-39). Given the novelty of the trial treatment, no a priori hypotheses are defined for PRO analyses. Therefore, PRO assessment will be explorative, providing the mean  $\pm$  standard deviation of each PRO category at each time-point. Linear Mixed Modelling analyses will be performed to compare differential effects over time and scores at each time-point, with the use of maximum likelihood estimation and an unstructured covariance matrix with a two-level structure (i.e. repeated time-points [lower level], patients [higher level]). To correct for multiple testing, a post-hoc Bonferroni correction will be performed per item, where the p-value will be divided by the number of timepoint-comparisons. In case of statistically significant differences, clinical relevance is determined by a Cohen's D  $>0.500$ .
  - Healthcare costs and costs due to productivity losses during trial treatment will be assessed with the iMTA Medical Consumption Questionnaire and iMTA Productivity Cost Questionnaire at baseline, one week after the first cycle, one week after the fourth cycle, one week after the eighth cycle, and one week after the twelfth cycle. An overview of the total costs of trial treatment (1, per protocol health-care costs; 2, additional health-care costs; 3, costs due to productivity losses) is established according to the Dutch Manual for Cost Analysis in Healthcare (40, 41).
  - Tumor marker fluctuations during trial treatment will be assessed by carcino-embryonic antigen (CEA) analysis before each subsequent cycle. Given the novelty of the trial treatment, no a priori hypotheses are defined. Linear Mixed Modeling analyses will be performed to compare differential effects over time and scores at each time-point, with the use of maximum

1  
2  
3 likelihood estimation and an unstructured covariance matrix with a two-level structure (i.e.  
4 repeated time-points [lower level], patients [higher level]). To correct for multiple testing, a  
5 pragmatically chosen  $p < 0.01$  is considered statistically significant.  
6  
7

- 8  
9  
10  
11  
12  
13  
14  
15  
16  
17  
18  
19  
20  
21  
22  
23  
24  
25  
26  
27  
28  
29  
30  
31  
32
- Feasibility of trial treatment is assessed through completion of twelve cycles of trial treatment, required dose reductions, and reasons for discontinuation. These results are presented as n (%);
  - Radiological response (according to radiological PCI and RECIST (39)) during and after trial treatment will be assessed by thoracoabdominal CT at baseline, after the fourth cycle, after the eighth cycle, and after the twelfth cycle. These results are presented as n (%);
  - To further investigate the pharmacokinetics of intraperitoneal irinotecan, peritoneal fluid and peripheral blood samples will be withdrawn at several time points during the first and fourth cycle. The maximum plasma concentration ( $C_{maxp}$ ), the time to maximum plasma concentration ( $T_{maxp}$ ), plasma area under the curve ( $AUC_p$ ), maximum intraperitoneal concentration ( $C_{maxip}$ ), the time to maximum intraperitoneal concentration ( $T_{maxip}$ ), intraperitoneal area under the curve ( $AUC_{ip}$ ) of irinotecan (plasma only) and SN-38 (plasma and peritoneal fluid) will be determined.

### 33 **Recruitment**

34 The study commenced in November 2022 and the first patients were enrolled in December 2022. It is  
35 expected to complete accrual within 2 years. To generate more awareness and to increase referrals of  
36 potential study candidates, a short Dutch summary of the study will be published in *The Dutch Journal*  
37 *for Oncology* (NTvO in Dutch). Further strategies to optimize accrual have not been defined *a priori*.  
38  
39  
40  
41

### 42 **Data collection and data management**

43 Outcomes are collected in all patients who completed at least one treatment cycle. All data are  
44 prospectively collected by a local investigator in each study center using standardized electronic case  
45 report forms linked to an ISO 27001 certified central study database (De Research Manager, Deventer,  
46 the Netherlands). This ISO 27001 certified system optimizes data quality by standardized data entry,  
47 coding, security and storage.  
48  
49  
50  
51

### 52 **Data monitoring**

53 Interim analyses are performed by principal investigators and trial coordinators four weeks after the  
54 first chemotherapy cycle of the 20<sup>th</sup> included patient and after the second chemotherapy cycle of the  
55 43<sup>th</sup> patient, after half of the study procedures and systemic cycles have been performed and applied.  
56  
57  
58  
59  
60 These analyses will only focus on the safety aspect. The study may be prematurely terminated by the

1  
2  
3 sponsor if there is evidence of an unacceptable risk for study patients. The sponsor will notify all  
4 concerned investigators, the medical ethics committee and regulatory authorities of the decision to  
5 terminate the study.  
6  
7

### 8 **Serious adverse events (SAEs) and suspected unexpected serious adverse reaction (SUSARs)**

9  
10 The investigator will report all SAEs and SUSARs to the sponsor without undue delay after obtaining  
11 knowledge of the events. The sponsor will report the SAEs and SUSARs through the web portal  
12 *ToetsingOnline* to the accredited METC that approved the protocol, within 7 days of first knowledge  
13 for SAEs or SUSARs that result in death or are life threatening followed by a period of maximum of 8  
14 days to complete the initial preliminary report. All other SAEs and SUSARs will be reported within a  
15 period of maximum 15 days after the sponsor has first knowledge of the serious adverse events.  
16  
17  
18  
19

### 20 **Auditing**

21  
22 Auditing is performed by independent qualified monitors of the study centers. The study is considered  
23 a low-risk study according to the brochure 'Kwaliteitsborging mensgebonden onderzoek 2.0' by the  
24 Dutch Federation of University Medical Centers.  
25  
26  
27

### 28 **Patient and public involvement**

29  
30 None  
31

### 32 **Ethics and dissemination**

#### 33 **Research ethics approval**

34  
35 The present study is approved by a central ethics committee (MEC-U, Nieuwegein, Netherlands,  
36 number R22.052) and the institutional review boards of both study centers.  
37  
38  
39  
40  
41  
42

#### 43 **Protocol amendments**

44  
45 Important modifications to the study protocol need to be authorized by the central ethics committee.  
46 After authorization, these modifications are communicated to the Dutch competent authority, the  
47 institutional review boards of both study centers, all investigators, study registries and patients (if  
48 required by the central ethics committee).  
49  
50  
51  
52  
53

#### 54 **Informed consent**

55  
56 Patients are enrolled by their treating physician and provide written informed consent. Patients are  
57 able to consent to questionnaires and participation in translational side studies separately.  
58  
59  
60

### Confidentiality

Personal data of patients is collected and processed in strict adherence to the Dutch law.

### Access to data

All authors have access to the final dataset, without any contractual agreements that limit access.

### Ancillary or post-study care

The Catharina Hospital is insured to cover harms caused by study participation and extends its insurance to any participating hospital. After trial treatment is stopped, patients will be treated according to Dutch guidelines, as aforementioned in section “*response evaluation*”.

### Dissemination policy

Study results will be submitted for publication in peer-reviewed medical journals and presented to patients, healthcare professionals and the public, during (inter)national meetings. Authorship eligibility guidelines are not defined a priori. The full study protocol and the Dutch informed consent form are made available upon written request to the corresponding author. After study completion, the participant-level dataset and statistical code will be made available upon reasonable request.

### Discussion

In this single-arm, open-label, phase II, patients with unresectable colorectal peritoneal metastases are treated with concomitant intraperitoneal and systemic cytotoxic therapy. The primary objective of the study is to assess overall survival (OS) after treatment with intraperitoneal irinotecan with concomitant mFOLFOX4 and bevacizumab. Secondary objectives are to assess progression-free survival (PFS), safety, patient reported outcomes (PRO's), costs, feasibility and pharmacokinetic parameters of intraperitoneal irinotecan with concomitant mFOLFOX4 and bevacizumab.

During this study, ascites and peritoneal biopsy samples will be collected and processed for translational research purposes. These samples will be used to establish organoids, in order to study drug response and resistance ex vivo in detail. This might aid in improved patient selection for both palliative and curative treatments, as well as enable a more personalized treatment approach (42).

Multiple studies have studied the effect of another strategy to apply chemotherapy intraperitoneally: pressurized intraperitoneal aerosol chemotherapy (PIPAC) (15, 43, 44). In contrast to PIPAC, the

1  
2  
3 intraperitoneal chemotherapy administered in this study is applied simultaneously with systemic  
4 chemotherapy without the need for complex (and expensive) devices or surgery. Furthermore, in  
5 comparison to PIPAC, INTERACT treatment has the potential benefit of exposing tumor cells to the  
6 cytotoxic agent much more frequent and for a much longer timespan (33)  
7  
8  
9

10 To the best of our knowledge, after the INTERACT study, this is only the second study in patients with  
11 peritoneal metastases of colorectal origin that combines standard of care systemic chemotherapy with  
12 intraperitoneally administered chemotherapy. As such, the present study will provide essential  
13 information about overall survival and progression-free survival, as well as on safety, feasibility, costs  
14 and PROs of treatment with intraperitoneal irinotecan, and will provide a framework for the  
15  
16  
17  
18  
19  
20  
21  
22  
23  
24  
25  
26  
27  
28  
29  
30  
31  
32  
33  
34  
35  
36  
37  
38  
39  
40  
41  
42  
43  
44  
45  
46  
47  
48  
49  
50  
51  
52  
53  
54  
55  
56  
57  
58  
59  
60



### Author affiliations

<sup>1</sup> Department of Surgery, Catharina Hospital, Eindhoven, the Netherlands

<sup>2</sup> Department of Medical Oncology, Erasmus MC Cancer Institute, Rotterdam, the Netherlands

<sup>3</sup> Department of Medical Oncology, Catharina Hospital, Eindhoven, the Netherlands

<sup>4</sup> Department of Surgical Oncology, Erasmus MC Cancer Institute, Rotterdam, the Netherlands

<sup>5</sup> Department of Radiology, Catharina Hospital, Eindhoven, the Netherlands

<sup>6</sup> Department of Hospital Pharmacy, Erasmus MC, Rotterdam, Zuid-Holland, the Netherlands

<sup>7</sup> Department of Surgical Oncology and Utrecht Platform for Organoid Technology, UMC Utrecht Cancer Centre, Utrecht, the Netherlands

<sup>8</sup> Department of Research and Development, Netherlands Comprehensive Cancer Organisation, Utrecht, the Netherlands

<sup>9</sup> School for Oncology and Reproduction, GROW, Maastricht, the Netherlands

### Collaborators

Dutch Peritoneal Oncology Group (DPOG); Dutch Colorectal Cancer Group (DCCG).

### Author Contributions

TBMvdH and NADG are the coordinating investigators. VCJvdV, RJL, TBMvdH, RJFB, IvH, GJMC, SWN, IHJTdH and JWAB are the local investigators of the first study center. NADG, SLWK, EvM, ARMBK, EVEM, CV and RHJM are the local investigators of the second study center. SK is the study pharmacologist supervising the pharmacokinetic analyses. JN is the study radiologist performing the central radiological review. SLWK is responsible for translational research on blood. OK is responsible for translational research on ascites and peritoneal lavage. JWAB is the principal investigator. VCJvdV, NADG, RJL, RHJM, and JWAB made substantial contributions to the conception and design of the study, drafted the protocol and drafted the manuscript. IEGvH, GJMC, IHJTdH, SWN, OK, SK, CV, TBMvdH and EvM made substantial contributions to conception and design of the study and critically revised the protocol and the manuscript for important intellectual content. All authors gave final approval of the version to be published and agree to be accountable for all aspects of the work.

1  
2  
3 **Funding**  
4

5 This study is supported by the Catharina Research Foundation (unrestricted grant, grant number CZE-  
6 2022.08).  
7  
8

9 **Competing interest**  
10

11 None to declare  
12  
13

14 **Patient consent for publication**  
15

16 Not required  
17  
18  
19  
20  
21  
22  
23  
24  
25  
26  
27  
28  
29  
30  
31  
32  
33  
34  
35  
36  
37  
38  
39  
40  
41  
42  
43  
44  
45  
46  
47  
48  
49  
50  
51  
52  
53  
54  
55  
56  
57  
58  
59  
60

For peer review only

## References

1. Lurvink RJ, Bakkers C, Rijken A, van Erning FN, Nienhuijs SW, Burger JW, et al. Increase in the incidence of synchronous and metachronous peritoneal metastases in patients with colorectal cancer: A nationwide study. *Eur J Surg Oncol*. 2021;47(5):1026-33.
2. van Gestel YR, de Hingh IH, van Herk-Sukel MP, van Erning FN, Beerepoot LV, Wijsman JH, et al. Patterns of metachronous metastases after curative treatment of colorectal cancer. *Cancer epidemiology*. 2014;38(4):448-54.
3. van de Vlasakker VC, Lurvink RJ, Cashin PH, Ceelen W, Deraco M, Goéré D, et al. The impact of PRODIGE 7 on the current worldwide practice of CRS-HIPEC for colorectal peritoneal metastases: A web-based survey and 2021 statement by Peritoneal Surface Oncology Group International (PSOGI). *European Journal of Surgical Oncology*. 2021;47(11):2888-92.
4. Verwaal VJ, van Ruth S, de Bree E, van Slooten GW, van Tinteren H, Boot H, et al. Randomized trial of cytoreduction and hyperthermic intraperitoneal chemotherapy versus systemic chemotherapy and palliative surgery in patients with peritoneal carcinomatosis of colorectal cancer. *Journal of clinical oncology*. 2003;21(20):3737-43.
5. Bakkers C, Lurvink RJ, Rijken A, Nienhuijs SW, Kok NF, Creemers GJ, et al. Treatment Strategies and Prognosis of Patients With Synchronous or Metachronous Colorectal Peritoneal Metastases: A Population-Based Study. *Ann Surg Oncol*. 2021;28(13):9073-83.
6. Jacquet P, Sugarbaker P. Current methodologies for clinical assessment of patients with peritoneal carcinomatosis. *Journal of Experimental & Clinical Cancer Research*. 1996;15(1):49-58.
7. Simkens GA, Rovers KP, Nienhuijs SW, de Hingh IH. Patient selection for cytoreductive surgery and HIPEC for the treatment of peritoneal metastases from colorectal cancer. *Cancer management and research*. 2017:259-66.
8. Jacquet P, Sugarbaker PH. Peritoneal-plasma barrier. *Cancer treatment and research*. 1996;82:53-64.
9. Flessner MF. The transport barrier in intraperitoneal therapy. *American Journal of Physiology-Renal Physiology*. 2005;288(3):F433-F42.
10. Al-Quteimat OM, Al-Badaineh MA. Intraperitoneal chemotherapy: rationale, applications, and limitations. *Journal of Oncology Pharmacy Practice*. 2014;20(5):369-80.
11. Averbach AM, Sugarbaker PH. Methodologic considerations in treatment using intraperitoneal chemotherapy. *Peritoneal carcinomatosis: principles of management*. 1996:289-309.
12. Dedrick RL, Myers CE, Bungay PM, DeVita V. Pharmacokinetic rationale for peritoneal drug administration. *Cancer Treat Rep*. 1978;62:1-13.
13. Guchelaar NA, Noordman BJ, Koolen SL, Mostert B, Madsen EV, Burger JW, et al. Intraperitoneal Chemotherapy for Unresectable Peritoneal Surface Malignancies. *Drugs*. 2023:1-22.
14. Rovers KP, Wassenaar EC, Lurvink RJ, Creemers G-JM, Burger JW, Los M, et al. Pressurized intraperitoneal aerosol chemotherapy (oxaliplatin) for unresectable colorectal peritoneal metastases: a multicenter, single-arm, phase II trial (CRC-PIPAC). *Annals of Surgical Oncology*. 2021:1-16.
15. Lurvink RJ, Rovers KP, Nienhuijs SW, Creemers G-J, Burger JW, de Hingh IH. Pressurized intraperitoneal aerosol chemotherapy with oxaliplatin (PIPAC-OX) in patients with colorectal peritoneal metastases—a systematic review. *Journal of Gastrointestinal Oncology*. 2021;12(Suppl 1):S242.
16. De Boer NL, Brandt-Kerkhof AR, Madsen EV, Diepeveen M, Van Meerten E, Van Eerden RA, et al. Concomitant intraperitoneal and systemic chemotherapy for extensive peritoneal metastases of colorectal origin: protocol of the multicentre, open-label, phase I, dose-escalation INTERACT trial. *BMJ open*. 2019;9(12):e034508.
17. Yan TD, Cao CQ, Munkholm-Larsen S. A pharmacological review on intraperitoneal chemotherapy for peritoneal malignancy. *World Journal of Gastrointestinal Oncology*. 2010;2(2):109.

18. Mathijssen RH, van Alphen RJ, Verweij J, Loos WJ, Nooter K, Stoter G, et al. Clinical pharmacokinetics and metabolism of irinotecan (CPT-11). *Clinical cancer research*. 2001;7(8):2182-94.
19. Ahn B-J, Choi MK, Park YS, Lee J, Park SH, Park JO, et al. Population pharmacokinetics of CPT-11 (irinotecan) in gastric cancer patients with peritoneal seeding after its intraperitoneal administration. *European journal of clinical pharmacology*. 2010;66:1235-45.
20. Choi MK, Ahn B-J, Yim D-S, Park YS, Kim S, Sohn TS, et al. Phase I study of intraperitoneal irinotecan in patients with gastric adenocarcinoma with peritoneal seeding. *Cancer chemotherapy and pharmacology*. 2011;67:5-11.
21. Maruyama M, Toukairin Y, Baba H, Kure N, Nagahama T, Ebuchi M. Pharmacokinetic study of the intraperitoneal administration of CPT-11 for patients with peritoneal seedings of gastric and colonic cancers. *Gan to kagaku ryoho Cancer & chemotherapy*. 2001;28(11):1505-7.
22. Matsui A, Okuda M, Tsujitsuka K, Enomoto K, Maruyama K. Pharmacology of intraperitoneal CPT-11. *Surgical Oncology Clinics*. 2003;12(3):795-811.
23. Saltz LB, Cox JV, Blanke C, Rosen LS, Fehrenbacher L, Moore MJ, et al. Irinotecan plus fluorouracil and leucovorin for metastatic colorectal cancer. *New England Journal of Medicine*. 2000;343(13):905-14.
24. de Man FM, Goey AK, van Schaik RH, Mathijssen RH, Bins S. Individualization of irinotecan treatment: a review of pharmacokinetics, pharmacodynamics, and pharmacogenetics. *Clinical pharmacokinetics*. 2018;57:1229-54.
25. Guichard S, Chatelut E, Lochon I, Bugat R, Mahjoubi M, Canal P. Comparison of the pharmacokinetics and efficacy of irinotecan after administration by the intravenous versus intraperitoneal route in mice. *Cancer chemotherapy and pharmacology*. 1998;42:165-70.
26. Hribaschek A, Kuhn R, Pross M, Meyer F, Fahlke J, Ridwelski K, et al. Intraperitoneal versus intravenous CPT-11 given intra- and postoperatively for peritoneal carcinomatosis in a rat model. *Surgery today*. 2006;36:57-62.
27. Nagahama T, Maruyama M, Goseki N. Intraperitoneal administration of CPT-11 in rats--experimental study for pharmacokinetics. *Gan to Kagaku ryoho Cancer & Chemotherapy*. 2000;27(12):1866-9.
28. Turcotte S, Sideris L, Younan R, Drolet P, Dubé P. Pharmacokinetics of intraperitoneal irinotecan in a pig model. *Journal of surgical oncology*. 2010;101(7):637-42.
29. Alberts DS, Liu P, Hannigan EV, O'Toole R, Williams SD, Young JA, et al. Intraperitoneal cisplatin plus intravenous cyclophosphamide versus intravenous cisplatin plus intravenous cyclophosphamide for stage III ovarian cancer. *New England Journal of Medicine*. 1996;335(26):1950-5.
30. Armstrong DK, Bundy B, Wenzel L, Huang HQ, Baergen R, Lele S, et al. Intraperitoneal cisplatin and paclitaxel in ovarian cancer. *New England Journal of Medicine*. 2006;354(1):34-43.
31. Speyer J, editor *The rationale behind intraperitoneal chemotherapy in gastrointestinal malignancies*. *Seminars in Oncology*; 1985.
32. Tewari D, Java JJ, Salani R, Armstrong DK, Markman M, Herzog T, et al. Long-term survival advantage and prognostic factors associated with intraperitoneal chemotherapy treatment in advanced ovarian cancer: a gynecologic oncology group study. *Obstetrical & Gynecological Survey*. 2015;70(8):505-6.
33. R. van Eerden NdB, J. van Kooten, C. Bakkers, M. Dietz, G-J. Creemers, S. Buijs, R. Bax, F. de Man, R. Lurvink, A. Brandt-Kerkhof, E. van Meerten, S. Koolen, I. de Hingh, C. Verhoef, R. Mathijssen, J.W.A. Burger. Phase I study of intraperitoneal irinotecan combined with palliative systemic chemotherapy in patients with colorectal peritoneal metastases. *British Journal of Surgery*. 2023(in press).
34. Chan A-W, Tetzlaff JM, Altman DG, Laupacis A, Gøtzsche PC, Krleža-Jerić K, et al. SPIRIT 2013 statement: defining standard protocol items for clinical trials. *Annals of internal medicine*. 2013;158(3):200-7.

- 1  
2  
3 35. Hulshof EC, de With M, de Man FM, Creemers G-J, Deiman BA, Swen JJ, et al. UGT1A1  
4 genotype-guided dosing of irinotecan: a prospective safety and cost analysis in poor metaboliser  
5 patients. *European Journal of Cancer*. 2022;162:148-57.  
6  
7 36. Nederland VKG. Landelijke werkgroep Gastrointestinale tumoren. Landelijke richtlijn erfelijke  
8 darmkanker Versie.1.  
9  
10 37. Fayers P, Aaronson NK, Bjordal K, Sullivan M. EORTC QLQ–C30 scoring manual: European  
11 Organisation for Research and Treatment of Cancer; 1995.  
12  
13 38. Foundation ER. EQ-5D-5L user guide. EuroQol Research Foundation Rotterdam, The  
14 Netherlands; 2019.  
15  
16 39. Whistance R, Conroy T, Chie W, Costantini A, Sezer O, Koller M, et al. Clinical and  
17 psychometric validation of the EORTC QLQ-CR29 questionnaire module to assess health-related  
18 quality of life in patients with colorectal cancer. *European journal of cancer*. 2009;45(17):3017-26.  
19  
20 40. Kanters TA, Bouwmans CA, van der Linden N, Tan SS, Hakkaart-van Roijen L. Update of the  
21 Dutch manual for costing studies in health care. *PloS one*. 2017;12(11):e0187477.  
22  
23 41. Tan SS, Bouwmans CA, Rutten FF, Hakkaart-van Roijen L. Update of the Dutch manual for  
24 costing in economic evaluations. *International journal of technology assessment in health care*.  
25 2012;28(2):152-8.  
26  
27 42. Lau HCH, Kranenburg O, Xiao H, Yu J. Organoid models of gastrointestinal cancers in basic  
28 and translational research. *Nat Rev Gastroenterol Hepatol*. 2020;17(4):203-22.  
29  
30 43. Sgarbura O, Eveno C, Alyami M, Bakrin N, Guiral DC, Ceelen W, et al. Consensus statement  
31 for treatment protocols in pressurized intraperitoneal aerosol chemotherapy (PIPAC). *Pleura and  
32 Peritoneum*. 2022.  
33  
34 44. Tempfer C, Giger-Pabst U, Hilal Z, Dogan A, Rezniczek GA. Pressurized intraperitoneal aerosol  
35 chemotherapy (PIPAC) for peritoneal carcinomatosis: systematic review of clinical and experimental  
36 evidence with special emphasis on ovarian cancer. *Archives of gynecology and obstetrics*.  
37 2018;298:243-57.  
38  
39  
40  
41  
42  
43  
44  
45  
46  
47  
48  
49  
50  
51  
52  
53  
54  
55  
56  
57  
58  
59  
60

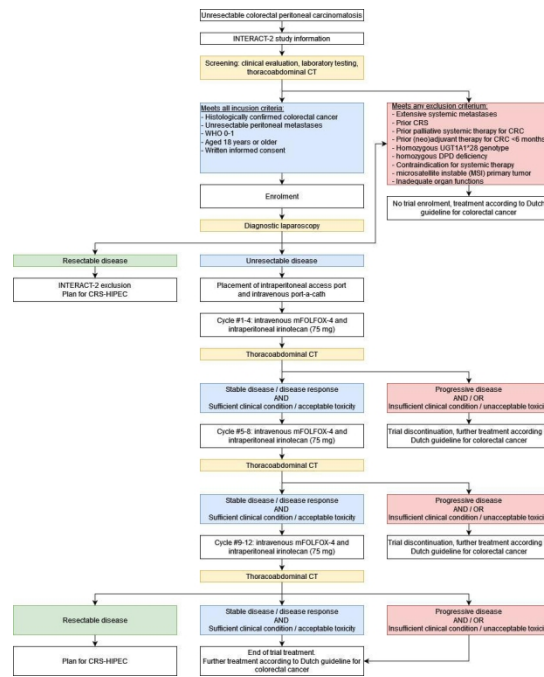

Figure 1. Study flowchart. WHO, World Health Organization performance status; CRS, cytoreductive surgery; CRC, HIPEC, hyperthermic intraperitoneal chemotherapy; colorectal cancer; DPD, dihydropyrimidine dehydrogenase.

1144x762mm (38 x 38 DPI)

Table 1: overview of study procedures

|                                            | Screening | Enrolment | Medical oncologist: intake | Diagnostic laparoscopy | Cycle #1 | Cycles #2-4 | One week after cycle #4 | Cycles #5-8 | One week after cycle #8 | Cycles #9-12 | One week after cycle #12 | Last study visit |
|--------------------------------------------|-----------|-----------|----------------------------|------------------------|----------|-------------|-------------------------|-------------|-------------------------|--------------|--------------------------|------------------|
| Multidisciplinary tumor board              | X         |           |                            |                        |          |             | X                       |             | X                       |              | X                        |                  |
| Medical history                            | X         | X         | X                          |                        |          |             |                         |             |                         |              |                          |                  |
| Inclusion and exclusion criteria           | X         | X         | X                          |                        |          |             |                         |             |                         |              |                          |                  |
| Provide study information                  | X         | X         | X                          |                        |          |             |                         |             |                         |              |                          |                  |
| Written informed consent                   |           | X         |                            |                        |          |             |                         |             |                         |              |                          |                  |
| Physical examination                       |           | X         | X                          |                        | X        | X           |                         | X           |                         | X            |                          |                  |
| Pre-operative screening                    |           | X         |                            |                        |          |             |                         |             |                         |              |                          |                  |
| Blood test: DPD and UGT1A1 genotype        |           | X         |                            |                        |          |             |                         |             |                         |              |                          |                  |
| Blood test: organ functions                |           | X         |                            |                        | X        | X           |                         | X           |                         | X            |                          |                  |
| Blood test: tumor marker <sup>a</sup>      |           | X         |                            |                        | X        | X           |                         | X           |                         | X            |                          |                  |
| Blood test: pregnancy <sup>b</sup>         |           | X         |                            |                        |          |             |                         |             |                         |              |                          |                  |
| Electrocardiogram                          |           | X         |                            |                        |          |             |                         |             |                         |              |                          |                  |
| Placement of port-a-cath                   |           |           |                            | X                      |          |             |                         |             |                         |              |                          |                  |
| Placement of peritoneal access port        |           |           |                            | X                      |          |             |                         |             |                         |              |                          |                  |
| Thoracoabdominal CT scan <sup>c</sup>      |           | X         |                            |                        |          |             | X                       |             | X                       |              | X                        |                  |
| Systemic chemotherapy                      |           |           |                            |                        | X        | X           |                         | X           |                         | X            |                          |                  |
| Intraperitoneal chemotherapy               |           |           |                            |                        | X        | X           |                         | X           |                         | X            |                          |                  |
| Clinical evaluation                        |           | X         | X                          |                        | X        | X           |                         | X           |                         | X            |                          | X                |
| Toxicity evaluation (CTCAE)                |           |           |                            |                        | X        | X           |                         | X           |                         | X            |                          | X                |
| Patient Reported Outcomes Questionnaires   |           | X         |                            |                        | X        |             | X                       |             | X                       |              | X                        |                  |
| Costs Questionnaires                       |           | X         |                            |                        | X        |             | X                       |             | X                       |              | X                        |                  |
| Pharmacokinetics                           |           |           |                            |                        | X        |             |                         |             |                         |              |                          |                  |
| Progression Free Survival                  |           |           |                            |                        |          |             | X                       |             | X                       |              | X                        | X                |
| Overall Survival                           |           |           |                            |                        | X        | X           |                         | X           |                         | X            |                          | X                |
| Remove peritoneal access port <sup>d</sup> |           |           |                            |                        |          |             |                         |             |                         |              |                          | X                |
| Translational Research: blood              |           | X         |                            |                        |          |             | X                       |             | X                       |              | X                        |                  |
| Translational Research: ascites            |           |           |                            | X                      | X        | X           |                         |             |                         |              |                          |                  |

<sup>a</sup>Carcino-embryonic antigen; <sup>b</sup>Only determined in women of fertile age (<55 years); <sup>c</sup>Unless already performed <6 weeks before diagnostic laparoscopy; <sup>d</sup>On patient's request; CT, Computed Tomography; CTCAE, Common Terminology Criteria for Adverse Events; Marked in grey: study-specific procedures;

# Reporting checklist for protocol of a clinical trial.

Based on the SPIRIT guidelines.

## Instructions to authors

Complete this checklist by entering the page numbers from your manuscript where readers will find each of the items listed below.

Your article may not currently address all the items on the checklist. Please modify your text to include the missing information. If you are certain that an item does not apply, please write "n/a" and provide a short explanation.

Upload your completed checklist as an extra file when you submit to a journal.

In your methods section, say that you used the SPIRIT reporting guidelines, and cite them as:

Chan A-W, Tetzlaff JM, Gøtzsche PC, Altman DG, Mann H, Berlin J, Dickersin K, Hróbjartsson A, Schulz KF, Parulekar WR, Krleža-Jerić K, Laupacis A, Moher D. SPIRIT 2013 Explanation and Elaboration: Guidance for protocols of clinical trials. *BMJ*. 2013;346:e7586

|                                   |                                                                                                                                 | Page   |
|-----------------------------------|---------------------------------------------------------------------------------------------------------------------------------|--------|
|                                   | Reporting Item                                                                                                                  | Number |
| <b>Administrative information</b> |                                                                                                                                 |        |
| Title                             | <a href="#">#1</a> Descriptive title identifying the study design, population, interventions, and, if applicable, trial acronym | 1      |



|    |                     |                     |                                                            |        |
|----|---------------------|---------------------|------------------------------------------------------------|--------|
| 1  | Trial registration  | <a href="#">#2a</a> | Trial identifier and registry name. If not yet registered, | 1      |
| 2  |                     |                     | name of intended registry                                  |        |
| 3  |                     |                     |                                                            |        |
| 4  |                     |                     |                                                            |        |
| 5  |                     |                     |                                                            |        |
| 6  | Trial registration: | <a href="#">#2b</a> | All items from the World Health Organization Trial         | 1      |
| 7  | data set            |                     | Registration Data Set                                      |        |
| 8  |                     |                     |                                                            |        |
| 9  |                     |                     |                                                            |        |
| 10 |                     |                     |                                                            |        |
| 11 | Protocol version    | <a href="#">#3</a>  | Date and version identifier                                | 1      |
| 12 |                     |                     |                                                            |        |
| 13 |                     |                     |                                                            |        |
| 14 |                     |                     |                                                            |        |
| 15 | Funding             | <a href="#">#4</a>  | Sources and types of financial, material, and other        | 19     |
| 16 |                     |                     | support                                                    |        |
| 17 |                     |                     |                                                            |        |
| 18 |                     |                     |                                                            |        |
| 19 |                     |                     |                                                            |        |
| 20 | Roles and           | <a href="#">#5a</a> | Names, affiliations, and roles of protocol contributors    | 18     |
| 21 | responsibilities:   |                     |                                                            |        |
| 22 |                     |                     |                                                            |        |
| 23 | contributorship     |                     |                                                            |        |
| 24 |                     |                     |                                                            |        |
| 25 |                     |                     |                                                            |        |
| 26 |                     |                     |                                                            |        |
| 27 |                     |                     |                                                            |        |
| 28 | Roles and           | <a href="#">#5b</a> | Name and contact information for the trial sponsor         | 1      |
| 29 | responsibilities:   |                     |                                                            |        |
| 30 |                     |                     |                                                            |        |
| 31 | sponsor contact     |                     |                                                            |        |
| 32 | information         |                     |                                                            |        |
| 33 |                     |                     |                                                            |        |
| 34 |                     |                     |                                                            |        |
| 35 |                     |                     |                                                            |        |
| 36 |                     |                     |                                                            |        |
| 37 |                     |                     |                                                            |        |
| 38 | Roles and           | <a href="#">#5c</a> | Role of study sponsor and funders, if any, in study        | 18     |
| 39 | responsibilities:   |                     | design; collection, management, analysis, and              |        |
| 40 |                     |                     | interpretation of data; writing of the report; and the     |        |
| 41 | sponsor and funder  |                     | decision to submit the report for publication, including   |        |
| 42 |                     |                     | whether they will have ultimate authority over any of      |        |
| 43 |                     |                     | these activities                                           |        |
| 44 |                     |                     |                                                            |        |
| 45 |                     |                     |                                                            |        |
| 46 |                     |                     |                                                            |        |
| 47 |                     |                     |                                                            |        |
| 48 |                     |                     |                                                            |        |
| 49 |                     |                     |                                                            |        |
| 50 |                     |                     |                                                            |        |
| 51 |                     |                     |                                                            |        |
| 52 | Roles and           | <a href="#">#5d</a> | Composition, roles, and responsibilities of the            | 14, 15 |
| 53 | responsibilities:   |                     | coordinating centre, steering committee, endpoint          |        |
| 54 |                     |                     | adjudication committee, data management team, and          |        |
| 55 | committees          |                     |                                                            |        |
| 56 |                     |                     |                                                            |        |
| 57 |                     |                     |                                                            |        |
| 58 |                     |                     |                                                            |        |
| 59 |                     |                     |                                                            |        |
| 60 |                     |                     |                                                            |        |

other individuals or groups overseeing the trial, if applicable (see Item 21a for data monitoring committee)

## Introduction

|                                                 |                     |                                                                                                                                                                                                            |     |
|-------------------------------------------------|---------------------|------------------------------------------------------------------------------------------------------------------------------------------------------------------------------------------------------------|-----|
| Background and rationale                        | <a href="#">#6a</a> | Description of research question and justification for undertaking the trial, including summary of relevant studies (published and unpublished) examining benefits and harms for each intervention         | 4,5 |
| Background and rationale: choice of comparators | <a href="#">#6b</a> | Explanation for choice of comparators                                                                                                                                                                      | 5   |
| Objectives                                      | <a href="#">#7</a>  | Specific objectives or hypotheses                                                                                                                                                                          | 5   |
| Trial design                                    | <a href="#">#8</a>  | Description of trial design including type of trial (eg, parallel group, crossover, factorial, single group), allocation ratio, and framework (eg, superiority, equivalence, non-inferiority, exploratory) | 5   |
| <b>Methods:</b>                                 |                     |                                                                                                                                                                                                            |     |
| Participants, interventions, and outcomes       |                     |                                                                                                                                                                                                            |     |
| Study setting                                   | <a href="#">#9</a>  | Description of study settings (eg, community clinic, academic hospital) and list of countries where data will be collected. Reference to where list of study sites can be obtained                         | 6   |

|    |                      |                      |                                                              |       |
|----|----------------------|----------------------|--------------------------------------------------------------|-------|
| 1  | Eligibility criteria | <a href="#">#10</a>  | Inclusion and exclusion criteria for participants. If        | 6,7   |
| 2  |                      |                      | applicable, eligibility criteria for study centres and       |       |
| 3  |                      |                      | individuals who will perform the interventions (eg,          |       |
| 4  |                      |                      | surgeons, psychotherapists)                                  |       |
| 5  |                      |                      |                                                              |       |
| 6  |                      |                      |                                                              |       |
| 7  |                      |                      |                                                              |       |
| 8  |                      |                      |                                                              |       |
| 9  |                      |                      |                                                              |       |
| 10 |                      |                      |                                                              |       |
| 11 | Interventions:       | <a href="#">#11a</a> | Interventions for each group with sufficient detail to allow | 7,8,9 |
| 12 |                      |                      | replication, including how and when they will be             |       |
| 13 | description          |                      | administered                                                 |       |
| 14 |                      |                      |                                                              |       |
| 15 |                      |                      |                                                              |       |
| 16 |                      |                      |                                                              |       |
| 17 |                      |                      |                                                              |       |
| 18 |                      |                      |                                                              |       |
| 19 | Interventions:       | <a href="#">#11b</a> | Criteria for discontinuing or modifying allocated            | 8,9   |
| 20 |                      |                      | interventions for a given trial participant (eg, drug dose   |       |
| 21 | modifications        |                      | change in response to harms, participant request, or         |       |
| 22 |                      |                      | improving / worsening disease)                               |       |
| 23 |                      |                      |                                                              |       |
| 24 |                      |                      |                                                              |       |
| 25 |                      |                      |                                                              |       |
| 26 |                      |                      |                                                              |       |
| 27 |                      |                      |                                                              |       |
| 28 |                      |                      |                                                              |       |
| 29 | Interventions:       | <a href="#">#11c</a> | Strategies to improve adherence to intervention              | 14    |
| 30 |                      |                      | protocols, and any procedures for monitoring adherence       |       |
| 31 | adherence            |                      | (eg, drug tablet return; laboratory tests)                   |       |
| 32 |                      |                      |                                                              |       |
| 33 |                      |                      |                                                              |       |
| 34 |                      |                      |                                                              |       |
| 35 |                      |                      |                                                              |       |
| 36 | Interventions:       | <a href="#">#11d</a> | Relevant concomitant care and interventions that are         | 7     |
| 37 |                      |                      | permitted or prohibited during the trial                     |       |
| 38 | concomitant care     |                      |                                                              |       |
| 39 |                      |                      |                                                              |       |
| 40 |                      |                      |                                                              |       |
| 41 |                      |                      |                                                              |       |
| 42 | Outcomes             | <a href="#">#12</a>  | Primary, secondary, and other outcomes, including the        | 6     |
| 43 |                      |                      | specific measurement variable (eg, systolic blood            |       |
| 44 |                      |                      | pressure), analysis metric (eg, change from baseline,        |       |
| 45 |                      |                      | final value, time to event), method of aggregation (eg,      |       |
| 46 |                      |                      | median, proportion), and time point for each outcome.        |       |
| 47 |                      |                      |                                                              |       |
| 48 |                      |                      |                                                              |       |
| 49 |                      |                      |                                                              |       |
| 50 |                      |                      |                                                              |       |
| 51 |                      |                      |                                                              |       |
| 52 |                      |                      |                                                              |       |
| 53 |                      |                      | Explanation of the clinical relevance of chosen efficacy     |       |
| 54 |                      |                      | and harm outcomes is strongly recommended                    |       |
| 55 |                      |                      |                                                              |       |
| 56 |                      |                      |                                                              |       |
| 57 |                      |                      |                                                              |       |
| 58 |                      |                      |                                                              |       |
| 59 |                      |                      |                                                              |       |
| 60 |                      |                      |                                                              |       |

|    |                           |                      |                                                           |       |
|----|---------------------------|----------------------|-----------------------------------------------------------|-------|
| 1  | Participant timeline      | <a href="#">#13</a>  | Time schedule of enrolment, interventions (including any  | 10,11 |
| 2  |                           |                      | run-ins and washouts), assessments, and visits for        |       |
| 3  |                           |                      | participants. A schematic diagram is highly               |       |
| 4  |                           |                      | recommended (see Figure)                                  |       |
| 5  |                           |                      |                                                           |       |
| 6  |                           |                      |                                                           |       |
| 7  |                           |                      |                                                           |       |
| 8  |                           |                      |                                                           |       |
| 9  |                           |                      |                                                           |       |
| 10 |                           |                      |                                                           |       |
| 11 | Sample size               | <a href="#">#14</a>  | Estimated number of participants needed to achieve        | 12    |
| 12 |                           |                      | study objectives and how it was determined, including     |       |
| 13 |                           |                      | clinical and statistical assumptions supporting any       |       |
| 14 |                           |                      | sample size calculations                                  |       |
| 15 |                           |                      |                                                           |       |
| 16 |                           |                      |                                                           |       |
| 17 |                           |                      |                                                           |       |
| 18 |                           |                      |                                                           |       |
| 19 |                           |                      |                                                           |       |
| 20 |                           |                      |                                                           |       |
| 21 | Recruitment               | <a href="#">#15</a>  | Strategies for achieving adequate participant enrolment   | 12    |
| 22 |                           |                      | to reach target sample size                               |       |
| 23 |                           |                      |                                                           |       |
| 24 |                           |                      |                                                           |       |
| 25 |                           |                      |                                                           |       |
| 26 | <b>Methods:</b>           |                      |                                                           |       |
| 27 |                           |                      |                                                           |       |
| 28 | <b>Assignment of</b>      |                      |                                                           |       |
| 29 | <b>interventions (for</b> |                      |                                                           |       |
| 30 | <b>controlled trials)</b> |                      |                                                           |       |
| 31 |                           |                      |                                                           |       |
| 32 |                           |                      |                                                           |       |
| 33 |                           |                      |                                                           |       |
| 34 |                           |                      |                                                           |       |
| 35 |                           |                      |                                                           |       |
| 36 | Allocation: sequence      | <a href="#">#16a</a> | Method of generating the allocation sequence (eg,         | 7     |
| 37 | generation                |                      | computer-generated random numbers), and list of any       |       |
| 38 |                           |                      | factors for stratification. To reduce predictability of a |       |
| 39 |                           |                      | random sequence, details of any planned restriction (eg,  |       |
| 40 |                           |                      | blocking) should be provided in a separate document that  |       |
| 41 |                           |                      | is unavailable to those who enrol participants or assign  |       |
| 42 |                           |                      | interventions                                             |       |
| 43 |                           |                      |                                                           |       |
| 44 |                           |                      |                                                           |       |
| 45 |                           |                      |                                                           |       |
| 46 |                           |                      |                                                           |       |
| 47 |                           |                      |                                                           |       |
| 48 |                           |                      |                                                           |       |
| 49 |                           |                      |                                                           |       |
| 50 |                           |                      |                                                           |       |
| 51 |                           |                      |                                                           |       |
| 52 |                           |                      |                                                           |       |
| 53 | Allocation                | <a href="#">#16b</a> | Mechanism of implementing the allocation sequence (eg,    | N/A   |
| 54 | concealment               |                      | central telephone; sequentially numbered, opaque,         |       |
| 55 |                           |                      |                                                           |       |
| 56 |                           |                      |                                                           |       |
| 57 |                           |                      |                                                           |       |
| 58 | mechanism                 |                      |                                                           |       |
| 59 |                           |                      |                                                           |       |
| 60 |                           |                      |                                                           |       |

sealed envelopes), describing any steps to conceal the sequence until interventions are assigned

Allocation: [#16c](#) Who will generate the allocation sequence, who will enrol participants, and who will assign participants to interventions

Blinding (masking) [#17a](#) Who will be blinded after assignment to interventions (eg, trial participants, care providers, outcome assessors, data analysts), and how

Blinding (masking): [#17b](#) If blinded, circumstances under which unblinding is permissible, and procedure for revealing a participant's allocated intervention during the trial

**Methods: Data collection, management, and analysis**

Data collection plan [#18a](#) Plans for assessment and collection of outcome, baseline, and other trial data, including any related processes to promote data quality (eg, duplicate measurements, training of assessors) and a description of study instruments (eg, questionnaires, laboratory tests) along with their reliability and validity, if known. Reference to where data collection forms can be found, if not in the protocol

|    |                            |                      |                                                             |          |
|----|----------------------------|----------------------|-------------------------------------------------------------|----------|
| 1  | Data collection plan:      | <a href="#">#18b</a> | Plans to promote participant retention and complete         | 14       |
| 2  |                            |                      |                                                             |          |
| 3  | retention                  |                      | follow-up, including list of any outcome data to be         |          |
| 4  |                            |                      | collected for participants who discontinue or deviate from  |          |
| 5  |                            |                      | intervention protocols                                      |          |
| 6  |                            |                      |                                                             |          |
| 7  |                            |                      |                                                             |          |
| 8  |                            |                      |                                                             |          |
| 9  |                            |                      |                                                             |          |
| 10 |                            |                      |                                                             |          |
| 11 | Data management            | <a href="#">#19</a>  | Plans for data entry, coding, security, and storage,        | 14       |
| 12 |                            |                      | including any related processes to promote data quality     |          |
| 13 |                            |                      | (eg, double data entry; range checks for data values).      |          |
| 14 |                            |                      | Reference to where details of data management               |          |
| 15 |                            |                      | procedures can be found, if not in the protocol             |          |
| 16 |                            |                      |                                                             |          |
| 17 |                            |                      |                                                             |          |
| 18 | Statistics: outcomes       | <a href="#">#20a</a> | Statistical methods for analysing primary and secondary     | 12,13,14 |
| 19 |                            |                      | outcomes. Reference to where other details of the           |          |
| 20 |                            |                      | statistical analysis plan can be found, if not in the       |          |
| 21 |                            |                      | protocol                                                    |          |
| 22 |                            |                      |                                                             |          |
| 23 |                            |                      |                                                             |          |
| 24 | Statistics: additional     | <a href="#">#20b</a> | Methods for any additional analyses (eg, subgroup and       | 12,13,14 |
| 25 | analyses                   |                      | adjusted analyses)                                          |          |
| 26 |                            |                      |                                                             |          |
| 27 |                            |                      |                                                             |          |
| 28 | Statistics: analysis       | <a href="#">#20c</a> | Definition of analysis population relating to protocol non- | 12,13,14 |
| 29 | population and             |                      | adherence (eg, as randomised analysis), and any             |          |
| 30 | missing data               |                      | statistical methods to handle missing data (eg, multiple    |          |
| 31 |                            |                      | imputation)                                                 |          |
| 32 |                            |                      |                                                             |          |
| 33 |                            |                      |                                                             |          |
| 34 |                            |                      |                                                             |          |
| 35 |                            |                      |                                                             |          |
| 36 |                            |                      |                                                             |          |
| 37 |                            |                      |                                                             |          |
| 38 |                            |                      |                                                             |          |
| 39 | <b>Methods: Monitoring</b> |                      |                                                             |          |
| 40 |                            |                      |                                                             |          |
| 41 |                            |                      |                                                             |          |
| 42 |                            |                      |                                                             |          |
| 43 |                            |                      |                                                             |          |
| 44 |                            |                      |                                                             |          |
| 45 |                            |                      |                                                             |          |
| 46 |                            |                      |                                                             |          |
| 47 |                            |                      |                                                             |          |
| 48 |                            |                      |                                                             |          |
| 49 |                            |                      |                                                             |          |
| 50 |                            |                      |                                                             |          |
| 51 | Data monitoring:           | <a href="#">#21a</a> | Composition of data monitoring committee (DMC);             | 14,15    |
| 52 | formal committee           |                      | summary of its role and reporting structure; statement of   |          |
| 53 |                            |                      | whether it is independent from the sponsor and              |          |
| 54 |                            |                      |                                                             |          |
| 55 |                            |                      |                                                             |          |
| 56 |                            |                      |                                                             |          |
| 57 |                            |                      |                                                             |          |
| 58 |                            |                      |                                                             |          |
| 59 |                            |                      |                                                             |          |
| 60 |                            |                      |                                                             |          |

competing interests; and reference to where further details about its charter can be found, if not in the protocol. Alternatively, an explanation of why a DMC is not needed

|    |                      |                      |                                                              |
|----|----------------------|----------------------|--------------------------------------------------------------|
| 1  |                      |                      |                                                              |
| 2  |                      |                      |                                                              |
| 3  |                      |                      |                                                              |
| 4  |                      |                      |                                                              |
| 5  |                      |                      |                                                              |
| 6  |                      |                      |                                                              |
| 7  |                      |                      |                                                              |
| 8  |                      |                      |                                                              |
| 9  |                      |                      |                                                              |
| 10 | Data monitoring:     | <a href="#">#21b</a> | Description of any interim analyses and stopping             |
| 11 |                      |                      |                                                              |
| 12 | interim analysis     |                      | guidelines, including who will have access to these          |
| 13 |                      |                      |                                                              |
| 14 |                      |                      | interim results and make the final decision to terminate     |
| 15 |                      |                      | the trial                                                    |
| 16 |                      |                      |                                                              |
| 17 |                      |                      |                                                              |
| 18 |                      |                      |                                                              |
| 19 |                      |                      |                                                              |
| 20 | Harms                | <a href="#">#22</a>  | Plans for collecting, assessing, reporting, and managing     |
| 21 |                      |                      |                                                              |
| 22 |                      |                      | solicited and spontaneously reported adverse events and      |
| 23 |                      |                      |                                                              |
| 24 |                      |                      | other unintended effects of trial interventions or trial     |
| 25 |                      |                      | conduct                                                      |
| 26 |                      |                      |                                                              |
| 27 |                      |                      |                                                              |
| 28 |                      |                      |                                                              |
| 29 |                      |                      |                                                              |
| 30 | Auditing             | <a href="#">#23</a>  | Frequency and procedures for auditing trial conduct, if      |
| 31 |                      |                      |                                                              |
| 32 |                      |                      | any, and whether the process will be independent from        |
| 33 |                      |                      |                                                              |
| 34 |                      |                      | investigators and the sponsor                                |
| 35 |                      |                      |                                                              |
| 36 |                      |                      |                                                              |
| 37 |                      |                      |                                                              |
| 38 | <b>Ethics and</b>    |                      |                                                              |
| 39 |                      |                      |                                                              |
| 40 | <b>dissemination</b> |                      |                                                              |
| 41 |                      |                      |                                                              |
| 42 |                      |                      |                                                              |
| 43 | Research ethics      | <a href="#">#24</a>  | Plans for seeking research ethics committee /                |
| 44 |                      |                      |                                                              |
| 45 | approval             |                      | institutional review board (REC / IRB) approval              |
| 46 |                      |                      |                                                              |
| 47 |                      |                      |                                                              |
| 48 | Protocol             | <a href="#">#25</a>  | Plans for communicating important protocol modifications     |
| 49 |                      |                      |                                                              |
| 50 | amendments           |                      | (eg, changes to eligibility criteria, outcomes, analyses) to |
| 51 |                      |                      |                                                              |
| 52 |                      |                      | relevant parties (eg, investigators, REC / IRBs, trial       |
| 53 |                      |                      |                                                              |
| 54 |                      |                      | participants, trial registries, journals, regulators)        |
| 55 |                      |                      |                                                              |
| 56 |                      |                      |                                                              |
| 57 |                      |                      |                                                              |
| 58 |                      |                      |                                                              |
| 59 |                      |                      |                                                              |
| 60 |                      |                      |                                                              |

|    |                       |                      |                                                                |       |
|----|-----------------------|----------------------|----------------------------------------------------------------|-------|
| 1  | Consent or assent     | <a href="#">#26a</a> | Who will obtain informed consent or assent from potential      | 16    |
| 2  |                       |                      | trial participants or authorised surrogates, and how (see      |       |
| 3  |                       |                      | Item 32)                                                       |       |
| 4  |                       |                      |                                                                |       |
| 5  |                       |                      |                                                                |       |
| 6  |                       |                      |                                                                |       |
| 7  |                       |                      |                                                                |       |
| 8  |                       |                      |                                                                |       |
| 9  | Consent or assent:    | <a href="#">#26b</a> | Additional consent provisions for collection and use of        | 16    |
| 10 | ancillary studies     |                      | participant data and biological specimens in ancillary         |       |
| 11 |                       |                      | studies, if applicable                                         |       |
| 12 |                       |                      |                                                                |       |
| 13 |                       |                      |                                                                |       |
| 14 |                       |                      |                                                                |       |
| 15 |                       |                      |                                                                |       |
| 16 | Confidentiality       | <a href="#">#27</a>  | How personal information about potential and enrolled          | 16    |
| 17 |                       |                      | participants will be collected, shared, and maintained in      |       |
| 18 |                       |                      | order to protect confidentiality before, during, and after     |       |
| 19 |                       |                      | the trial                                                      |       |
| 20 |                       |                      |                                                                |       |
| 21 |                       |                      |                                                                |       |
| 22 |                       |                      |                                                                |       |
| 23 |                       |                      |                                                                |       |
| 24 |                       |                      |                                                                |       |
| 25 |                       |                      |                                                                |       |
| 26 | Declaration of        | <a href="#">#28</a>  | Financial and other competing interests for principal          | 19    |
| 27 | interests             |                      | investigators for the overall trial and each study site        |       |
| 28 |                       |                      |                                                                |       |
| 29 |                       |                      |                                                                |       |
| 30 |                       |                      |                                                                |       |
| 31 | Data access           | <a href="#">#29</a>  | Statement of who will have access to the final trial           | 19    |
| 32 |                       |                      | dataset, and disclosure of contractual agreements that         |       |
| 33 |                       |                      | limit such access for investigators                            |       |
| 34 |                       |                      |                                                                |       |
| 35 |                       |                      |                                                                |       |
| 36 |                       |                      |                                                                |       |
| 37 |                       |                      |                                                                |       |
| 38 |                       |                      |                                                                |       |
| 39 | Ancillary and post    | <a href="#">#30</a>  | Provisions, if any, for ancillary and post-trial care, and for | 16    |
| 40 | trial care            |                      | compensation to those who suffer harm from trial               |       |
| 41 |                       |                      | participation                                                  |       |
| 42 |                       |                      |                                                                |       |
| 43 |                       |                      |                                                                |       |
| 44 |                       |                      |                                                                |       |
| 45 |                       |                      |                                                                |       |
| 46 |                       |                      |                                                                |       |
| 47 | Dissemination policy: | <a href="#">#31a</a> | Plans for investigators and sponsor to communicate trial       | 16,17 |
| 48 | trial results         |                      | results to participants, healthcare professionals, the         |       |
| 49 |                       |                      | public, and other relevant groups (eg, via publication,        |       |
| 50 |                       |                      | reporting in results databases, or other data sharing          |       |
| 51 |                       |                      | arrangements), including any publication restrictions          |       |
| 52 |                       |                      |                                                                |       |
| 53 |                       |                      |                                                                |       |
| 54 |                       |                      |                                                                |       |
| 55 |                       |                      |                                                                |       |
| 56 |                       |                      |                                                                |       |
| 57 |                       |                      |                                                                |       |
| 58 |                       |                      |                                                                |       |
| 59 |                       |                      |                                                                |       |
| 60 |                       |                      |                                                                |       |



|    |                                            |                                                                                 |     |
|----|--------------------------------------------|---------------------------------------------------------------------------------|-----|
| 1  | Dissemination policy: <a href="#">#31b</a> | Authorship eligibility guidelines and any intended use of                       | 18  |
| 2  |                                            |                                                                                 |     |
| 3  | authorship                                 | professional writers                                                            |     |
| 4  |                                            |                                                                                 |     |
| 5  |                                            |                                                                                 |     |
| 6  | Dissemination policy: <a href="#">#31c</a> | Plans, if any, for granting public access to the full                           | 19  |
| 7  |                                            |                                                                                 |     |
| 8  | reproducible                               | protocol, participant-level dataset, and statistical code                       |     |
| 9  |                                            |                                                                                 |     |
| 10 | research                                   |                                                                                 |     |
| 11 |                                            |                                                                                 |     |
| 12 |                                            |                                                                                 |     |
| 13 |                                            |                                                                                 |     |
| 14 | <b>Appendices</b>                          |                                                                                 |     |
| 15 |                                            |                                                                                 |     |
| 16 |                                            |                                                                                 |     |
| 17 | Informed consent                           | <a href="#">#32</a> Model consent form and other related documentation          | N/A |
| 18 |                                            |                                                                                 |     |
| 19 | materials                                  | given to participants and authorised surrogates                                 |     |
| 20 |                                            |                                                                                 |     |
| 21 |                                            |                                                                                 |     |
| 22 | Biological specimens                       | <a href="#">#33</a> Plans for collection, laboratory evaluation, and storage of | 17  |
| 23 |                                            |                                                                                 |     |
| 24 |                                            | biological specimens for genetic or molecular analysis in                       |     |
| 25 |                                            |                                                                                 |     |
| 26 |                                            | the current trial and for future use in ancillary studies, if                   |     |
| 27 |                                            |                                                                                 |     |
| 28 |                                            | applicable                                                                      |     |
| 29 |                                            |                                                                                 |     |
| 30 |                                            |                                                                                 |     |
| 31 |                                            |                                                                                 |     |

32 The SPIRIT Explanation and Elaboration paper is distributed under the terms of the Creative  
 33 Commons Attribution License CC-BY-NC. This checklist was completed on 11. July 2023 using  
 34 <https://www.goodreports.org/>, a tool made by the [EQUATOR Network](#) in collaboration with  
 35 [Penelope.ai](#)  
 36  
 37  
 38  
 39  
 40  
 41  
 42  
 43  
 44  
 45  
 46  
 47  
 48  
 49  
 50  
 51  
 52  
 53  
 54  
 55  
 56  
 57  
 58  
 59  
 60
