# Supplementary material for: Intraperitoneal irinotecan with concomitant FOLFOX and bevacizumab for patients with unresectable colorectal peritoneal metastases: protocol of the multicentre, open-label, phase II, INTERACT-II trial
Source: PubMed Central journal article supplement — BMJ Open. 2024 Jan 18;14(1):e077667. doi: 10.1136/bmjopen-2023-077667 (PMC10806681; doi:10.1136/bmjopen-2023-077667), 2024-01-18
Supplement: bmjopen-2023-077667supp001.pdf [file bmjopen-2023-077667supp001.pdf]

Table 1: overview of study procedures

|                                            | Screening | Enrolment | Medical oncologist: intake | Diagnostic laparoscopy | Cycle #1 | Cycles #2-4 | One week after cycle #4 | Cycles #5-8 | One week after cycle #8 | Cycles #9-12 | One week after cycle #12 | Last study visit |
|--------------------------------------------|-----------|-----------|----------------------------|------------------------|----------|-------------|-------------------------|-------------|-------------------------|--------------|--------------------------|------------------|
| Multidisciplinary tumor board              | X         |           |                            |                        |          |             | X                       |             | X                       |              | X                        |                  |
| Medical history                            | X         | X         | X                          |                        |          |             |                         |             |                         |              |                          |                  |
| Inclusion and exclusion criteria           | X         | X         | X                          |                        |          |             |                         |             |                         |              |                          |                  |
| Provide study information                  | X         | X         | X                          |                        |          |             |                         |             |                         |              |                          |                  |
| Written informed consent                   |           | X         |                            |                        |          |             |                         |             |                         |              |                          |                  |
| Physical examination                       |           | X         | X                          |                        | X        | X           |                         | X           |                         | X            |                          |                  |
| Pre-operative screening                    |           | X         |                            |                        |          |             |                         |             |                         |              |                          |                  |
| Blood test: DPD and UGT1A1 genotype        |           | X         |                            |                        |          |             |                         |             |                         |              |                          |                  |
| Blood test: organ functions                |           | X         |                            |                        | X        | X           |                         | X           |                         | X            |                          |                  |
| Blood test: tumor marker <sup>a</sup>      |           | X         |                            |                        | X        | X           |                         | X           |                         | X            |                          |                  |
| Blood test: pregnancy <sup>b</sup>         |           | X         |                            |                        |          |             |                         |             |                         |              |                          |                  |
| Electrocardiogram                          |           | X         |                            |                        |          |             |                         |             |                         |              |                          |                  |
| Placement of port-a-cath                   |           |           |                            | X                      |          |             |                         |             |                         |              |                          |                  |
| Placement of peritoneal access port        |           |           |                            | X                      |          |             |                         |             |                         |              |                          |                  |
| Thoracoabdominal CT scan <sup>c</sup>      |           | X         |                            |                        |          |             | X                       |             | X                       |              | X                        |                  |
| Systemic chemotherapy                      |           |           |                            |                        | X        | X           |                         | X           |                         | X            |                          |                  |
| Intraperitoneal chemotherapy               |           |           |                            |                        | X        | X           |                         | X           |                         | X            |                          |                  |
| Clinical evaluation                        |           | X         | X                          |                        | X        | X           |                         | X           |                         | X            |                          | X                |
| Toxicity evaluation (CTCAE)                |           |           |                            |                        | X        | X           |                         | X           |                         | X            |                          | X                |
| Patient Reported Outcomes Questionnaires   |           | X         |                            |                        | X        |             | X                       |             | X                       |              | X                        |                  |
| Costs Questionnaires                       |           | X         |                            |                        | X        |             | X                       |             | X                       |              | X                        |                  |
| Pharmacokinetics                           |           |           |                            |                        | X        |             |                         |             |                         |              |                          |                  |
| Progression Free Survival                  |           |           |                            |                        |          |             | X                       |             | X                       |              | X                        | X                |
| Overall Survival                           |           |           |                            |                        | X        | X           |                         | X           |                         | X            |                          | X                |
| Remove peritoneal access port <sup>d</sup> |           |           |                            |                        |          |             |                         |             |                         |              |                          | X                |
| Translational Research: blood              |           | X         |                            |                        |          |             | X                       |             | X                       |              | X                        |                  |
| Translational Research: ascites            |           |           |                            | X                      | X        | X           |                         |             |                         |              |                          |                  |

<sup>a</sup>Carcino-embryonic antigen; <sup>b</sup>Only determined in women of fertile age (<55 years); <sup>c</sup>Unless already performed <6 weeks before diagnostic laparoscopy; <sup>d</sup>On patient's request; CT, Computed Tomography; CTCAE, Common Terminology Criteria for Adverse Events; Marked in grey: study-specific procedures;
